# Supplementary material
Source: ML conference proceedings conference paper supplement (https://openreview.net/forum?id=HenpVfO3Wp)
Supplement: supplementary_material [file preds_unweighted_unnormalized_ngrams.pdf › lm-behavioral-phases/analyses/preds_unweighted_unnormalized_ngrams.pdf]

Coefficient (n-gram bits / language model bit)

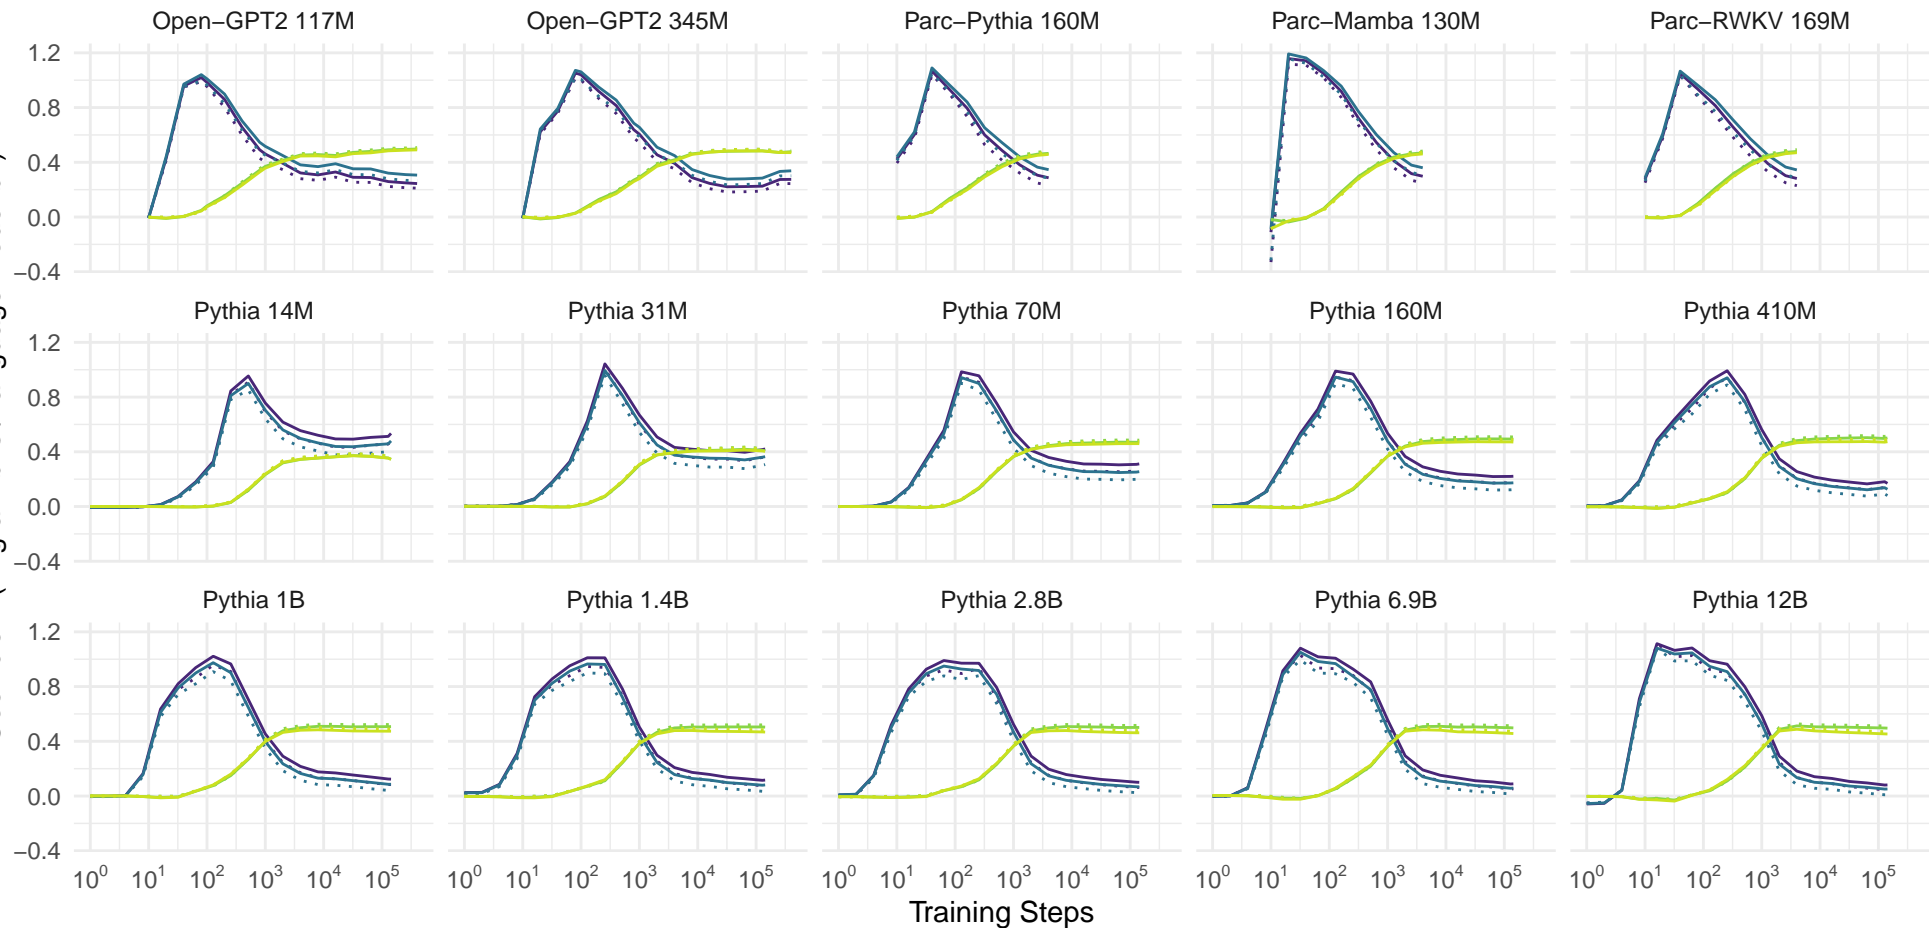

### Similarity Metric

- Semantic Similarity (Wiki Unweighted)
- Semantic Similarity (CC Unweighted)

### Heuristic

- 1-gram Logprobs (Matched)
- 1-gram Logprobs (Unmatched)
- 5-gram Logprobs (Matched)
- 5-gram Logprobs (Unmatched)
