# Supplementary material
Source: ML conference proceedings conference paper supplement (https://openreview.net/forum?id=HenpVfO3Wp)

(A) Regression coefficients

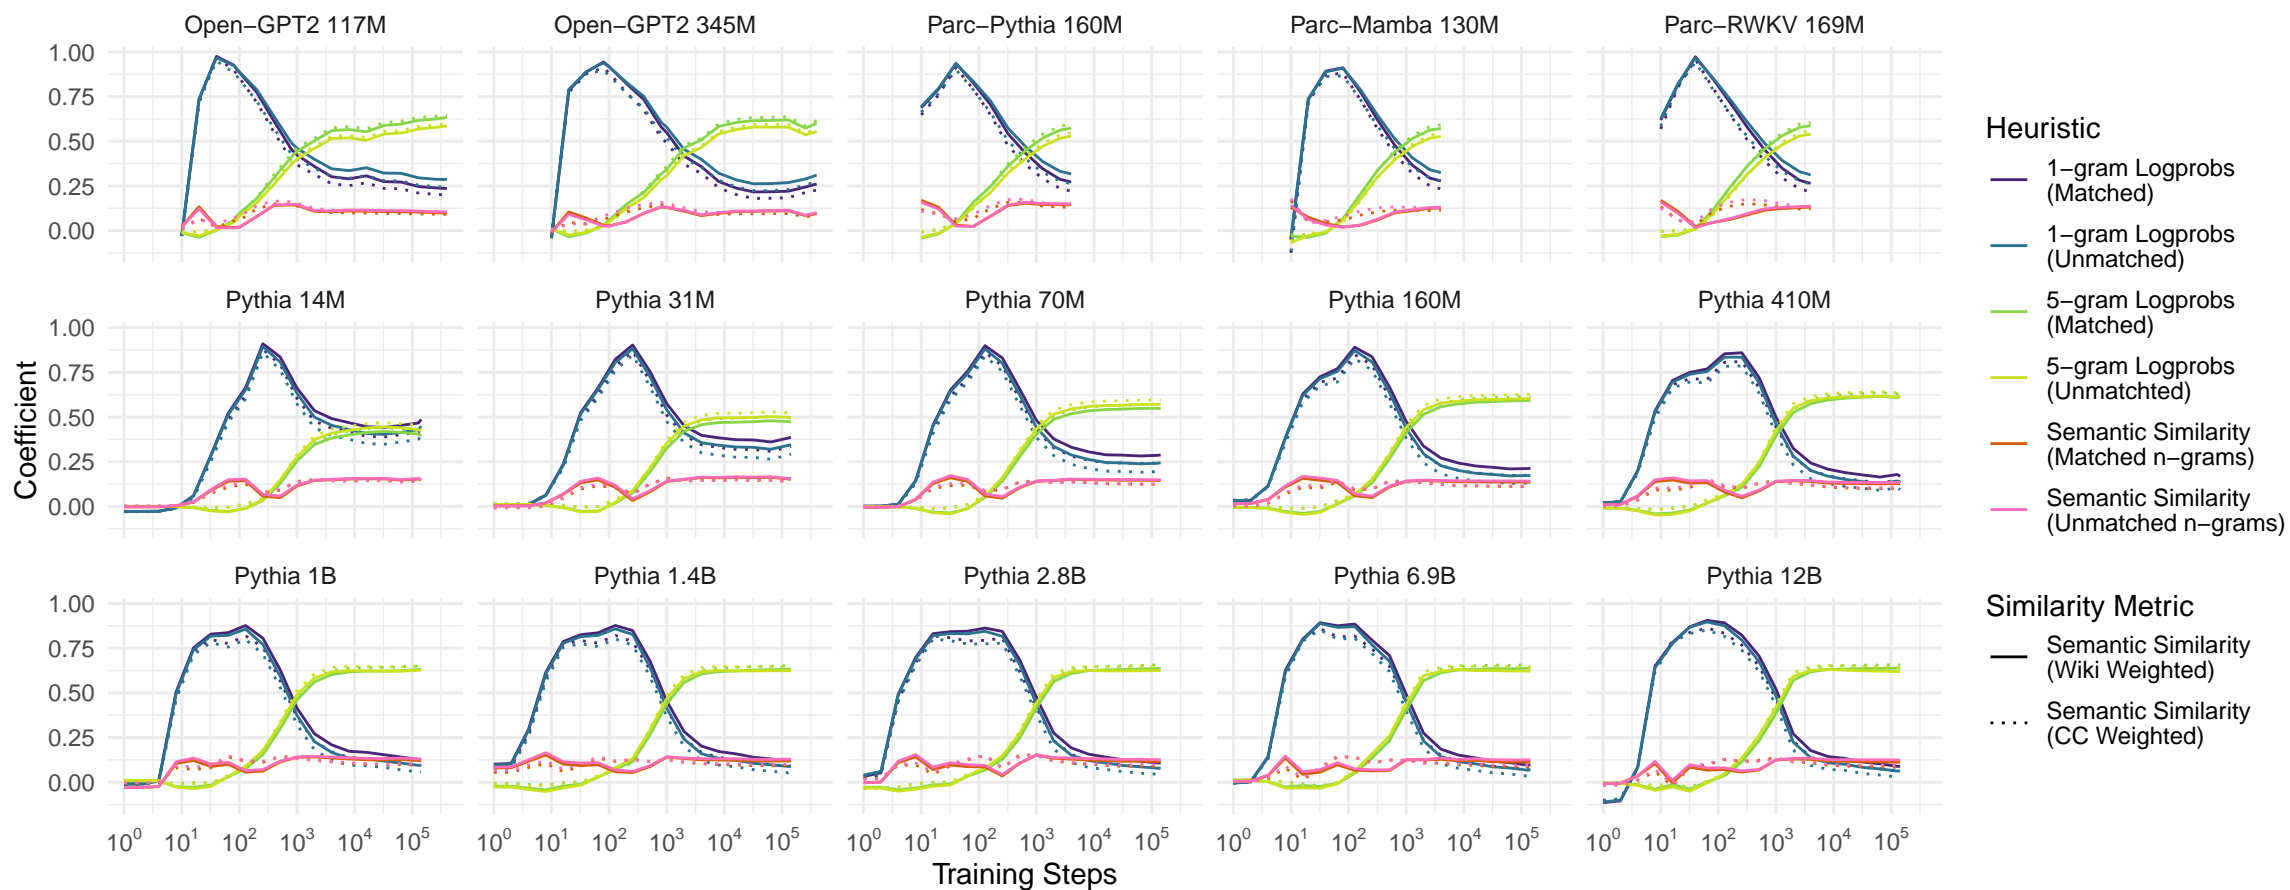

(B) Variance explained by all heuristics

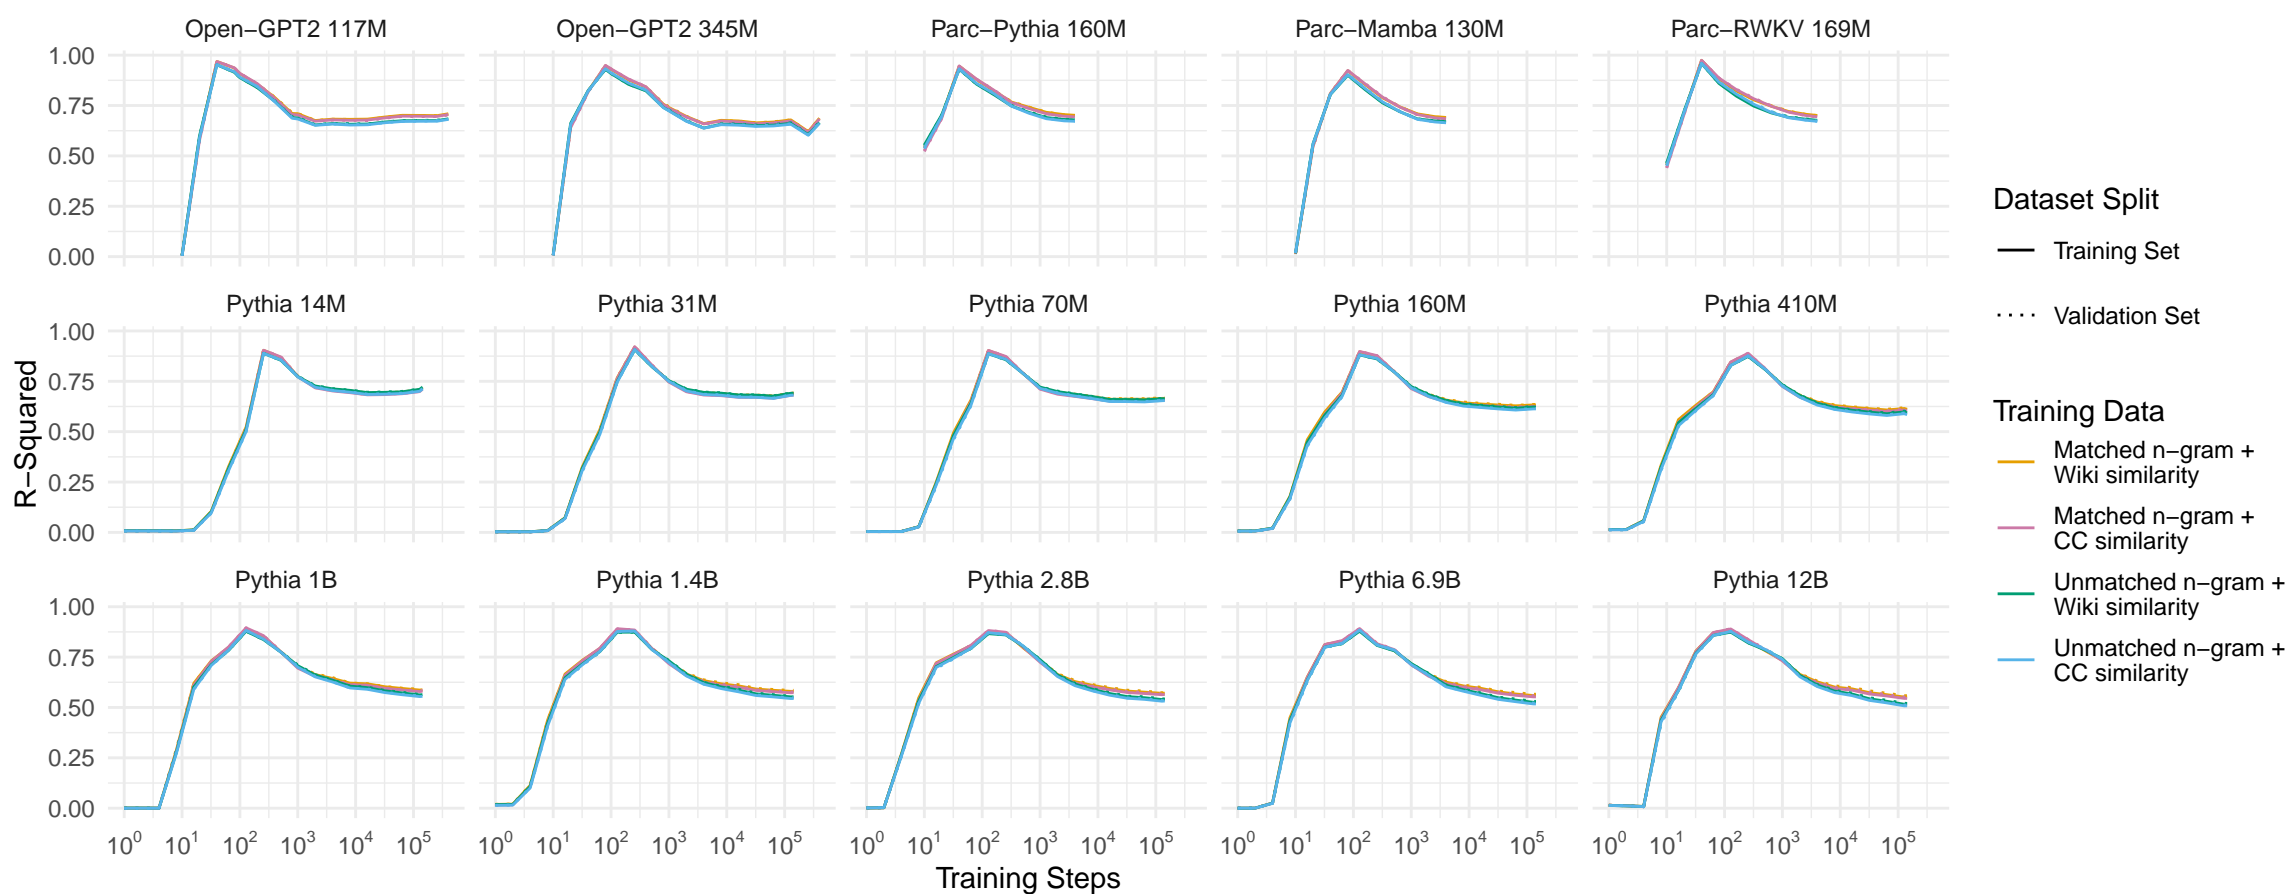

Supplement: supplementary_material [file coefs_and_rsq.pdf › lm-behavioral-phases/analyses/coefs_and_rsq.pdf]

Pearson Correlation Coefficient

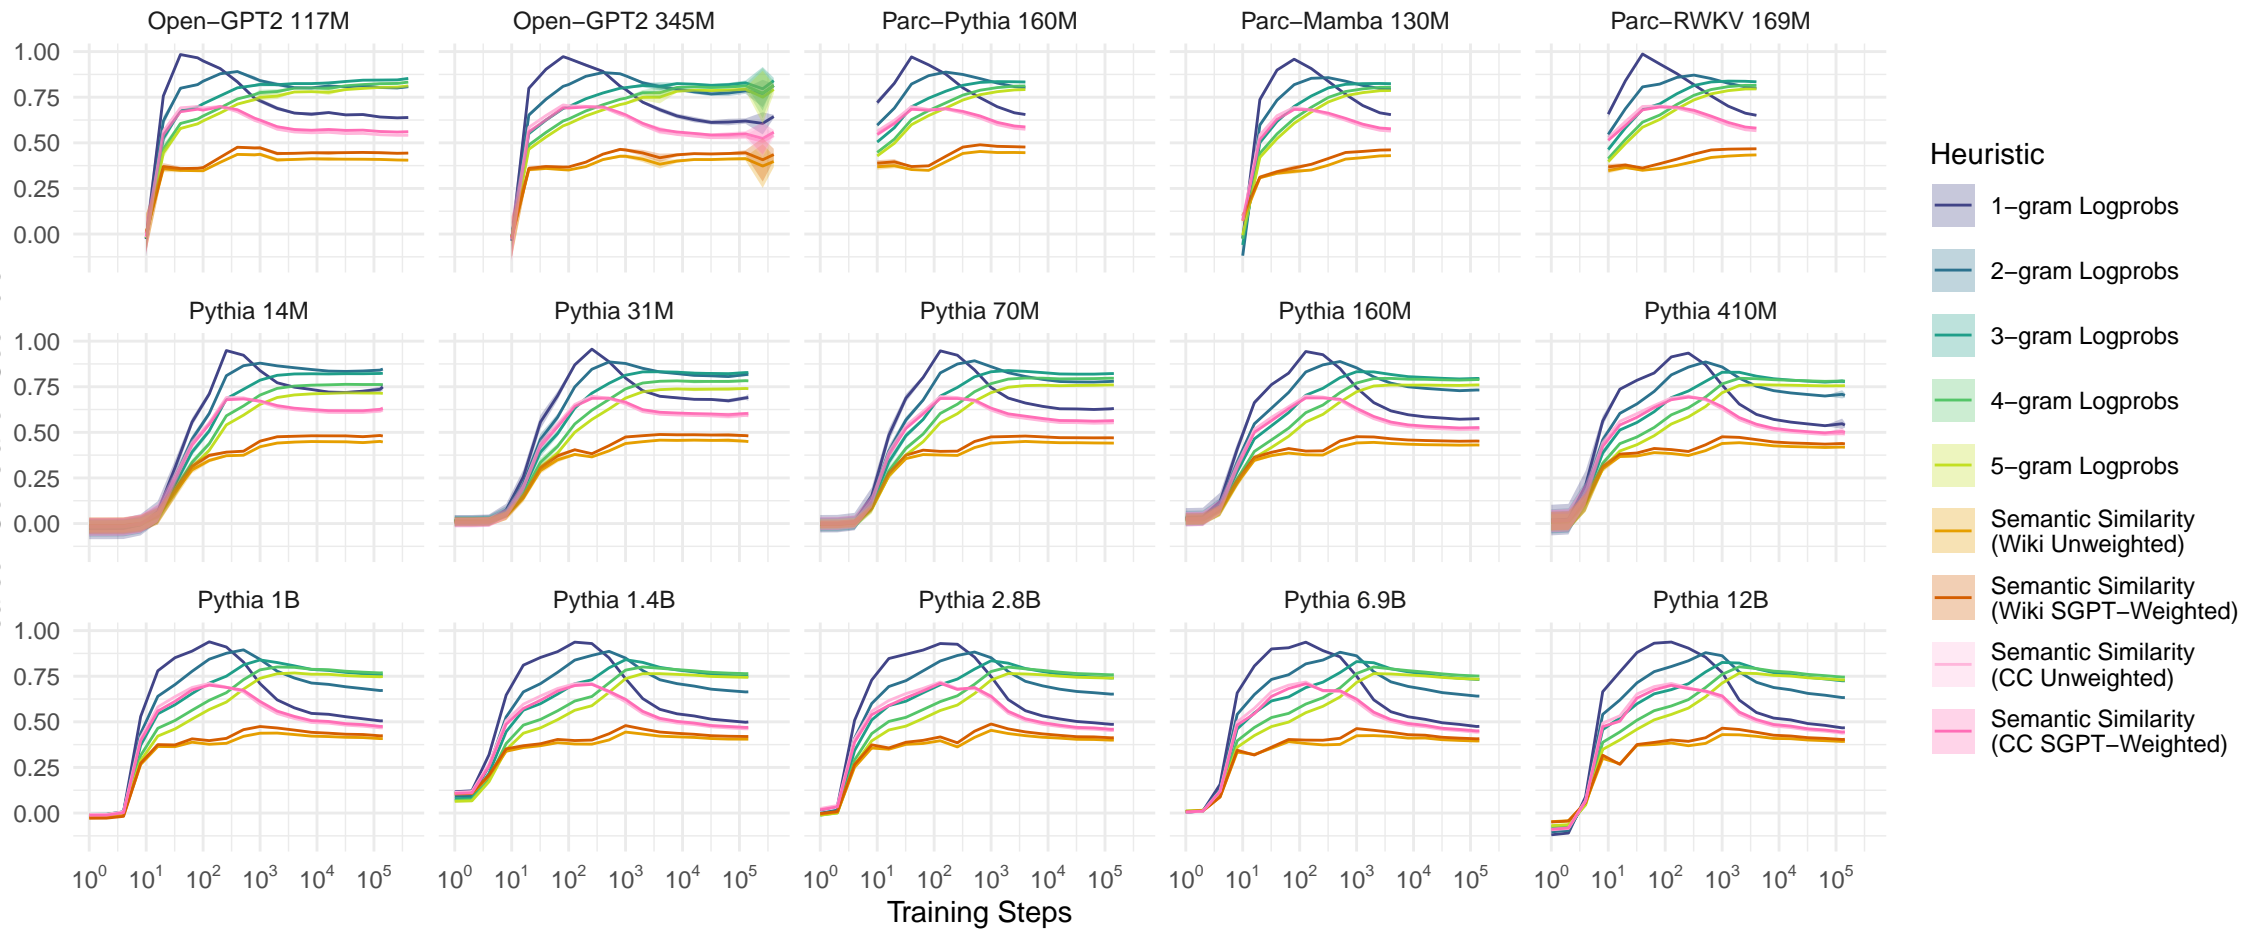

Supplement: supplementary_material [file corrs_pearson.pdf › lm-behavioral-phases/analyses/corrs_pearson.pdf]

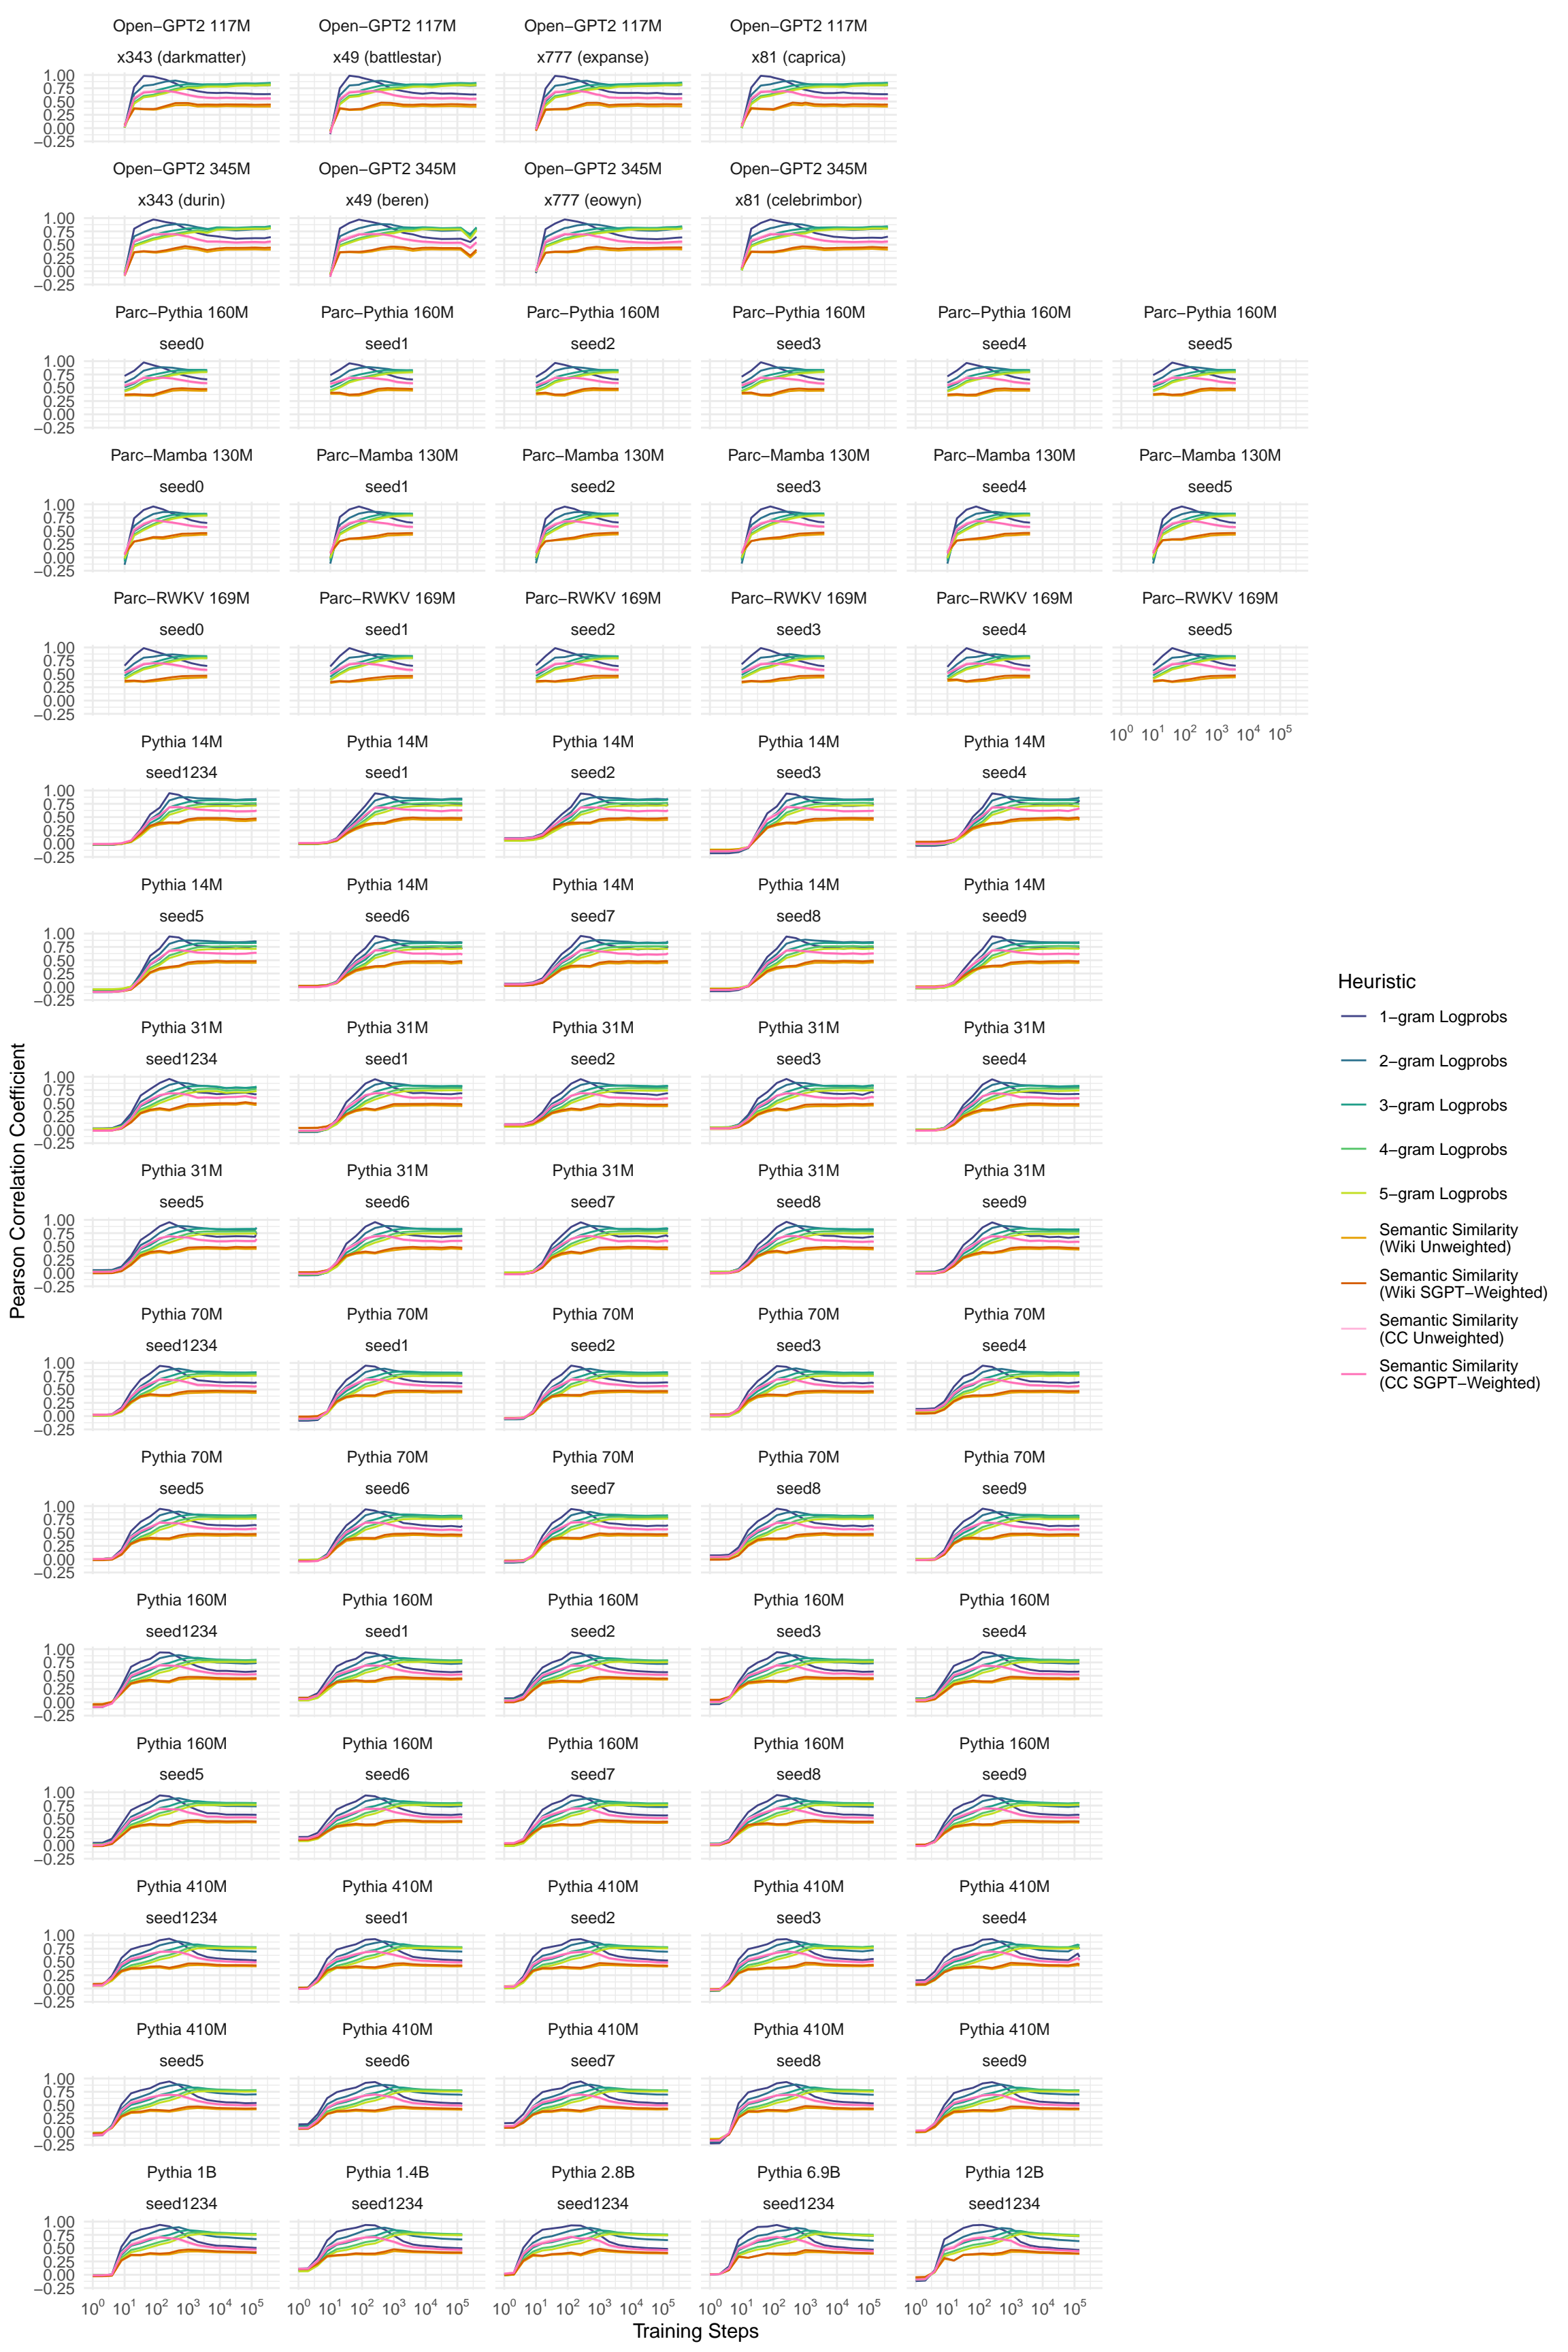

Supplement: supplementary_material [file corrs_pearson_seed.pdf › lm-behavioral-phases/analyses/corrs_pearson_seed.pdf]

Spearman Correlation Coefficient

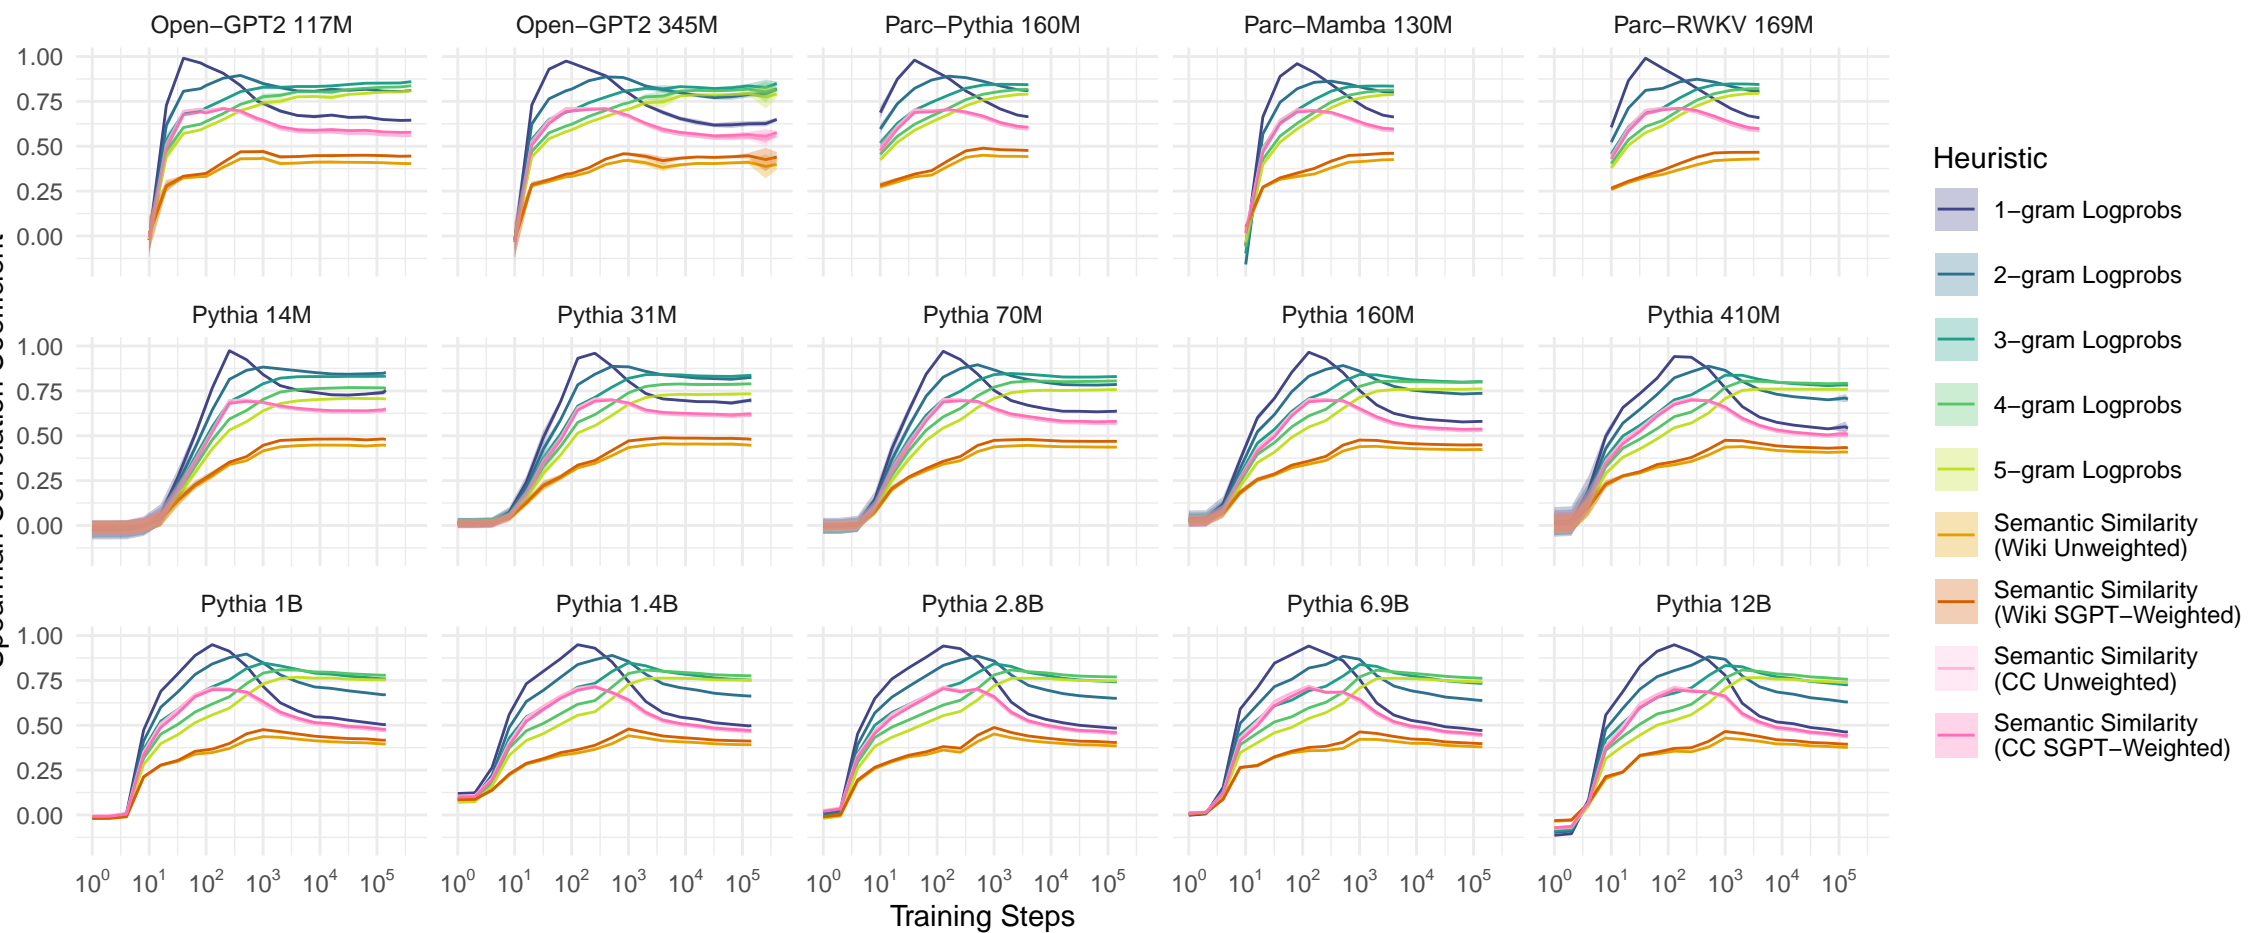

Supplement: supplementary_material [file corrs_spearman.pdf › lm-behavioral-phases/analyses/corrs_spearman.pdf]

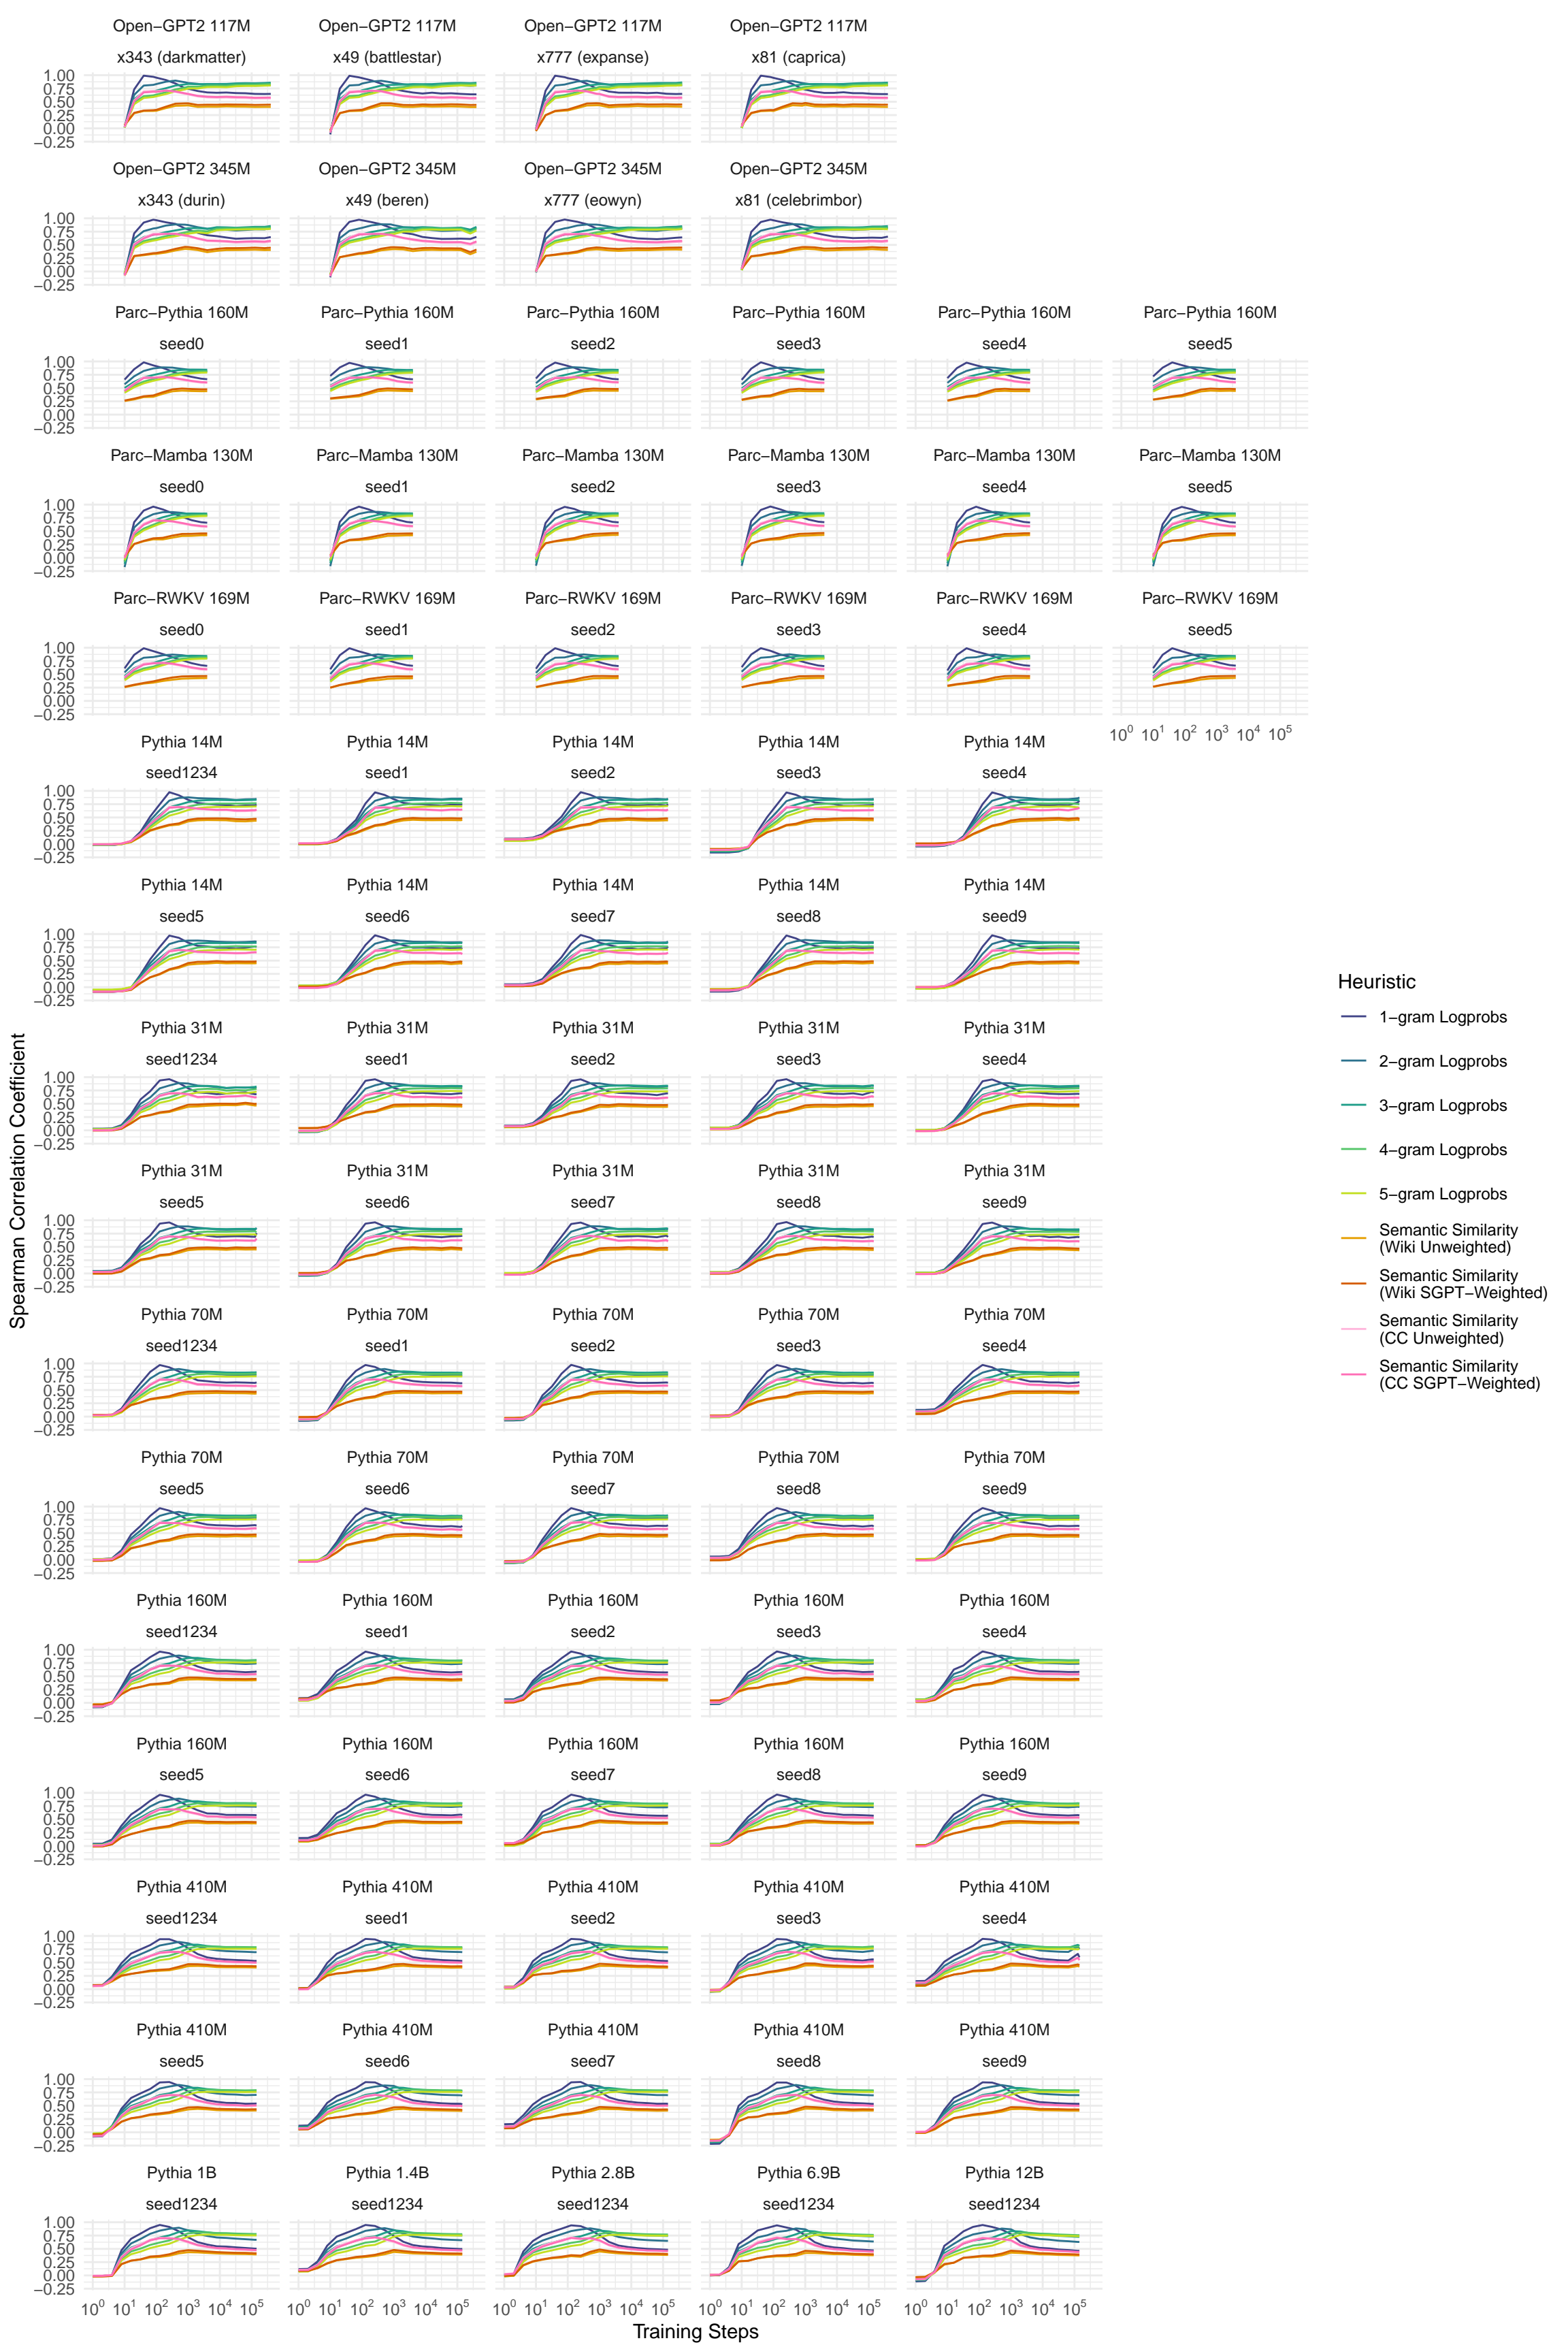

Supplement: supplementary_material [file corrs_spearman_seed.pdf › lm-behavioral-phases/analyses/corrs_spearman_seed.pdf]

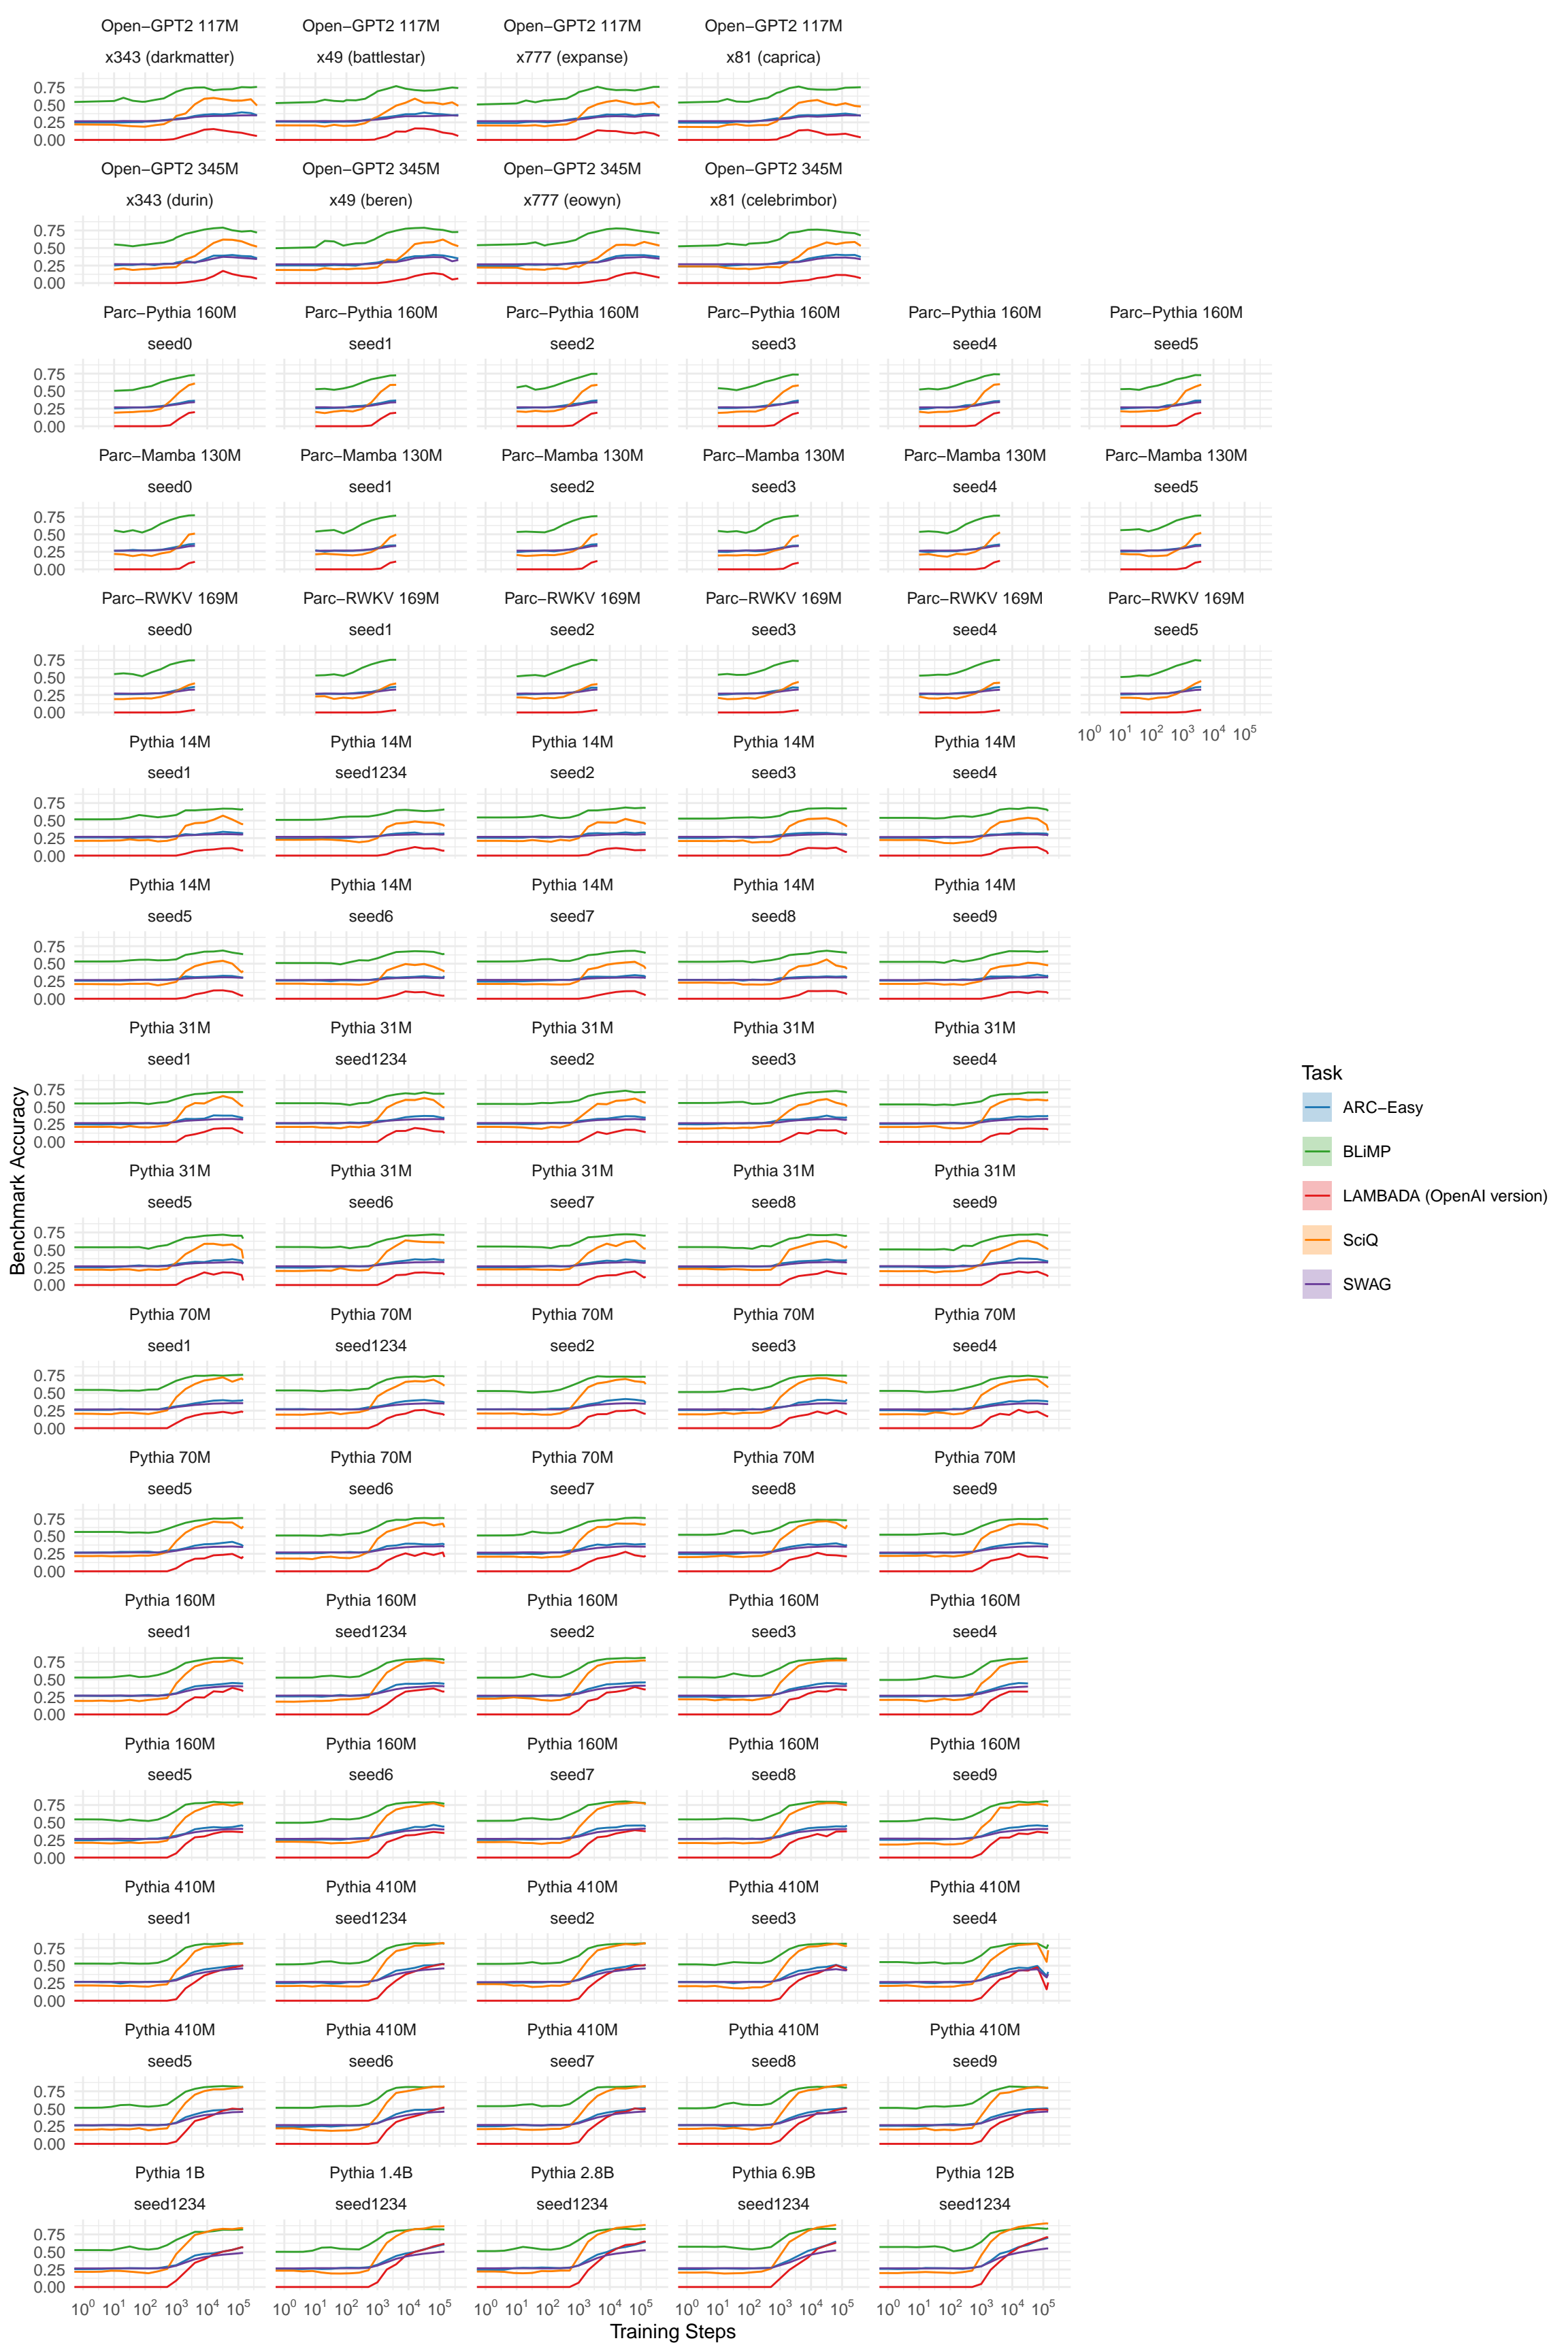

Supplement: supplementary_material [file eval_acc.pdf › lm-behavioral-phases/analyses/eval_acc.pdf]

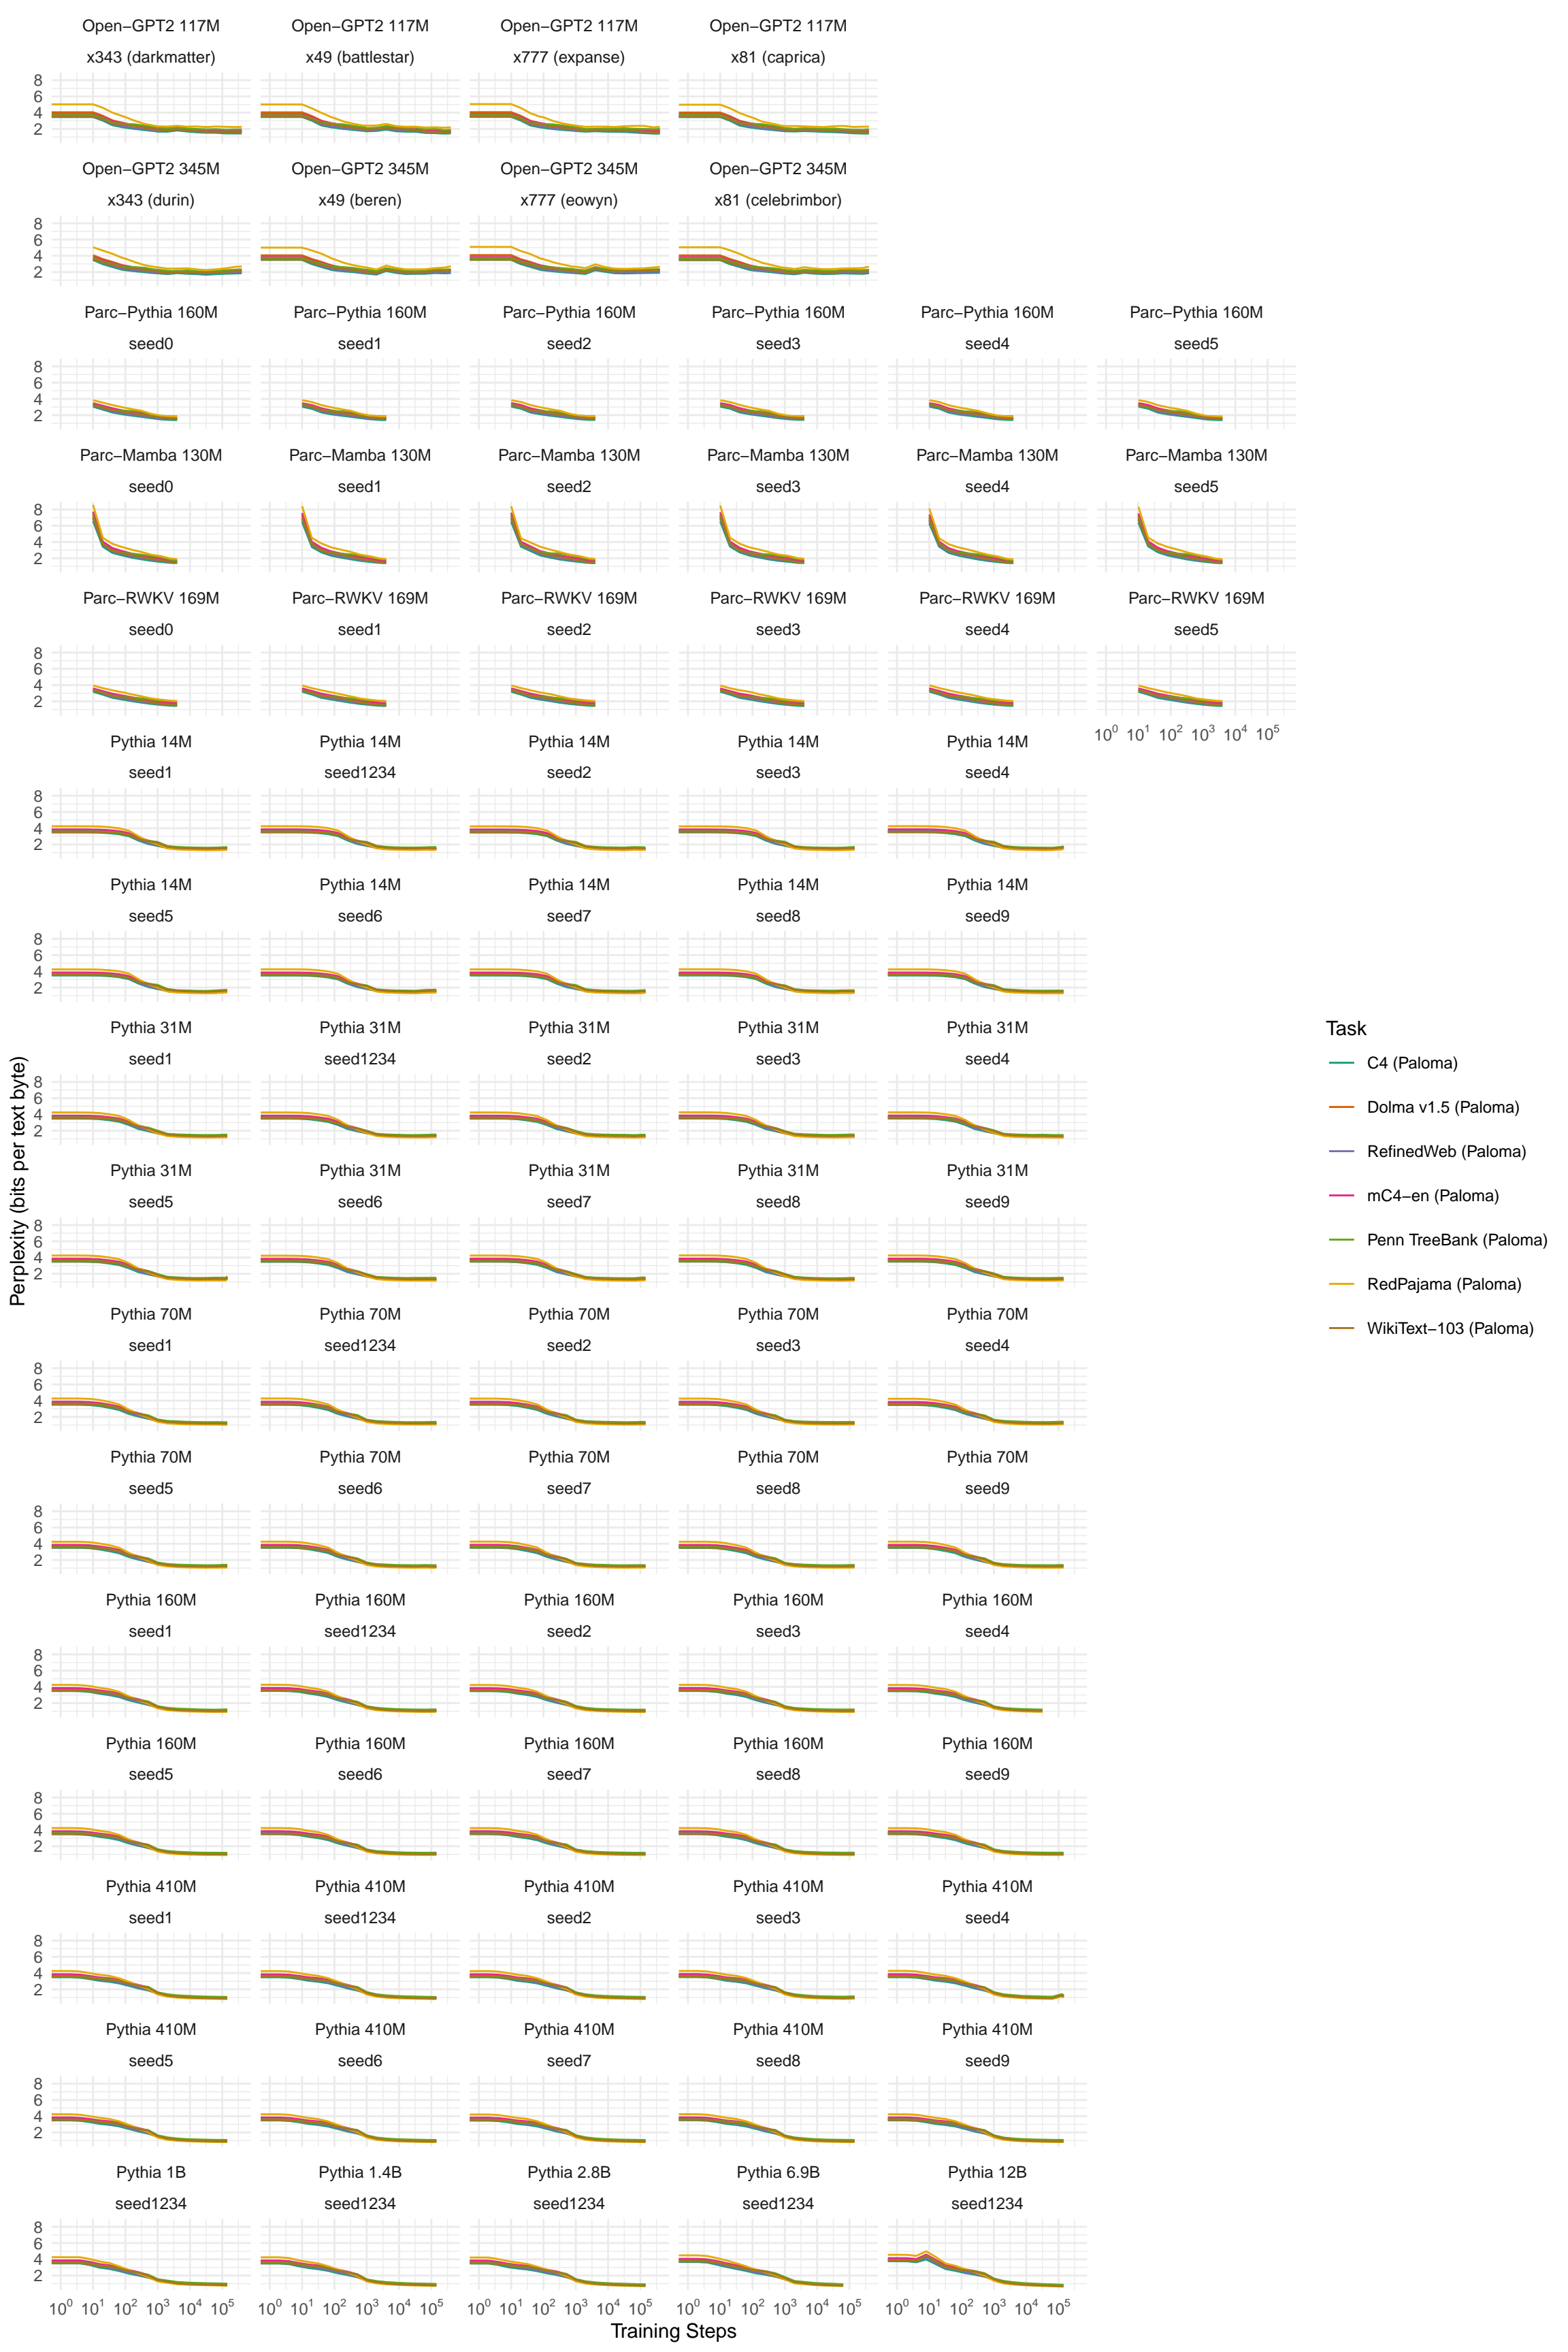

Supplement: supplementary_material [file eval_ppl.pdf › lm-behavioral-phases/analyses/eval_ppl.pdf]

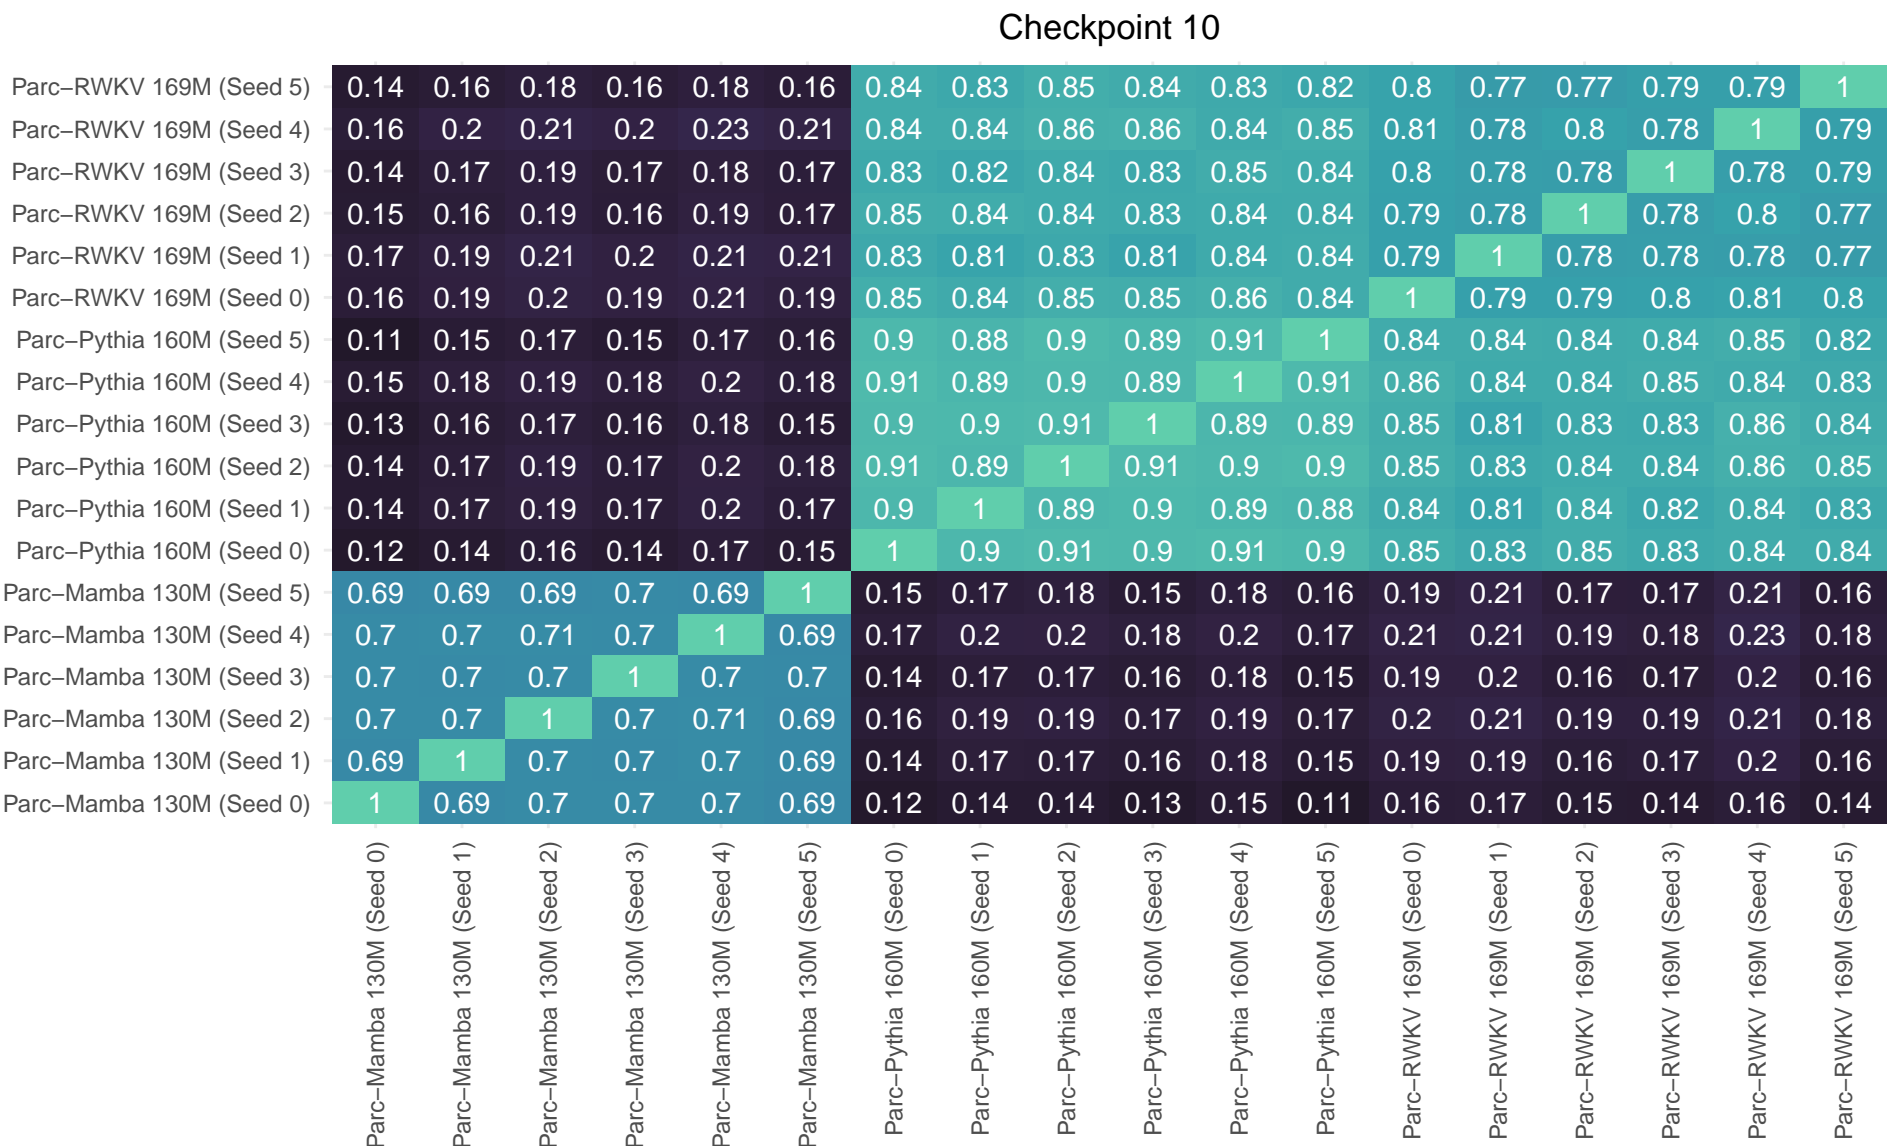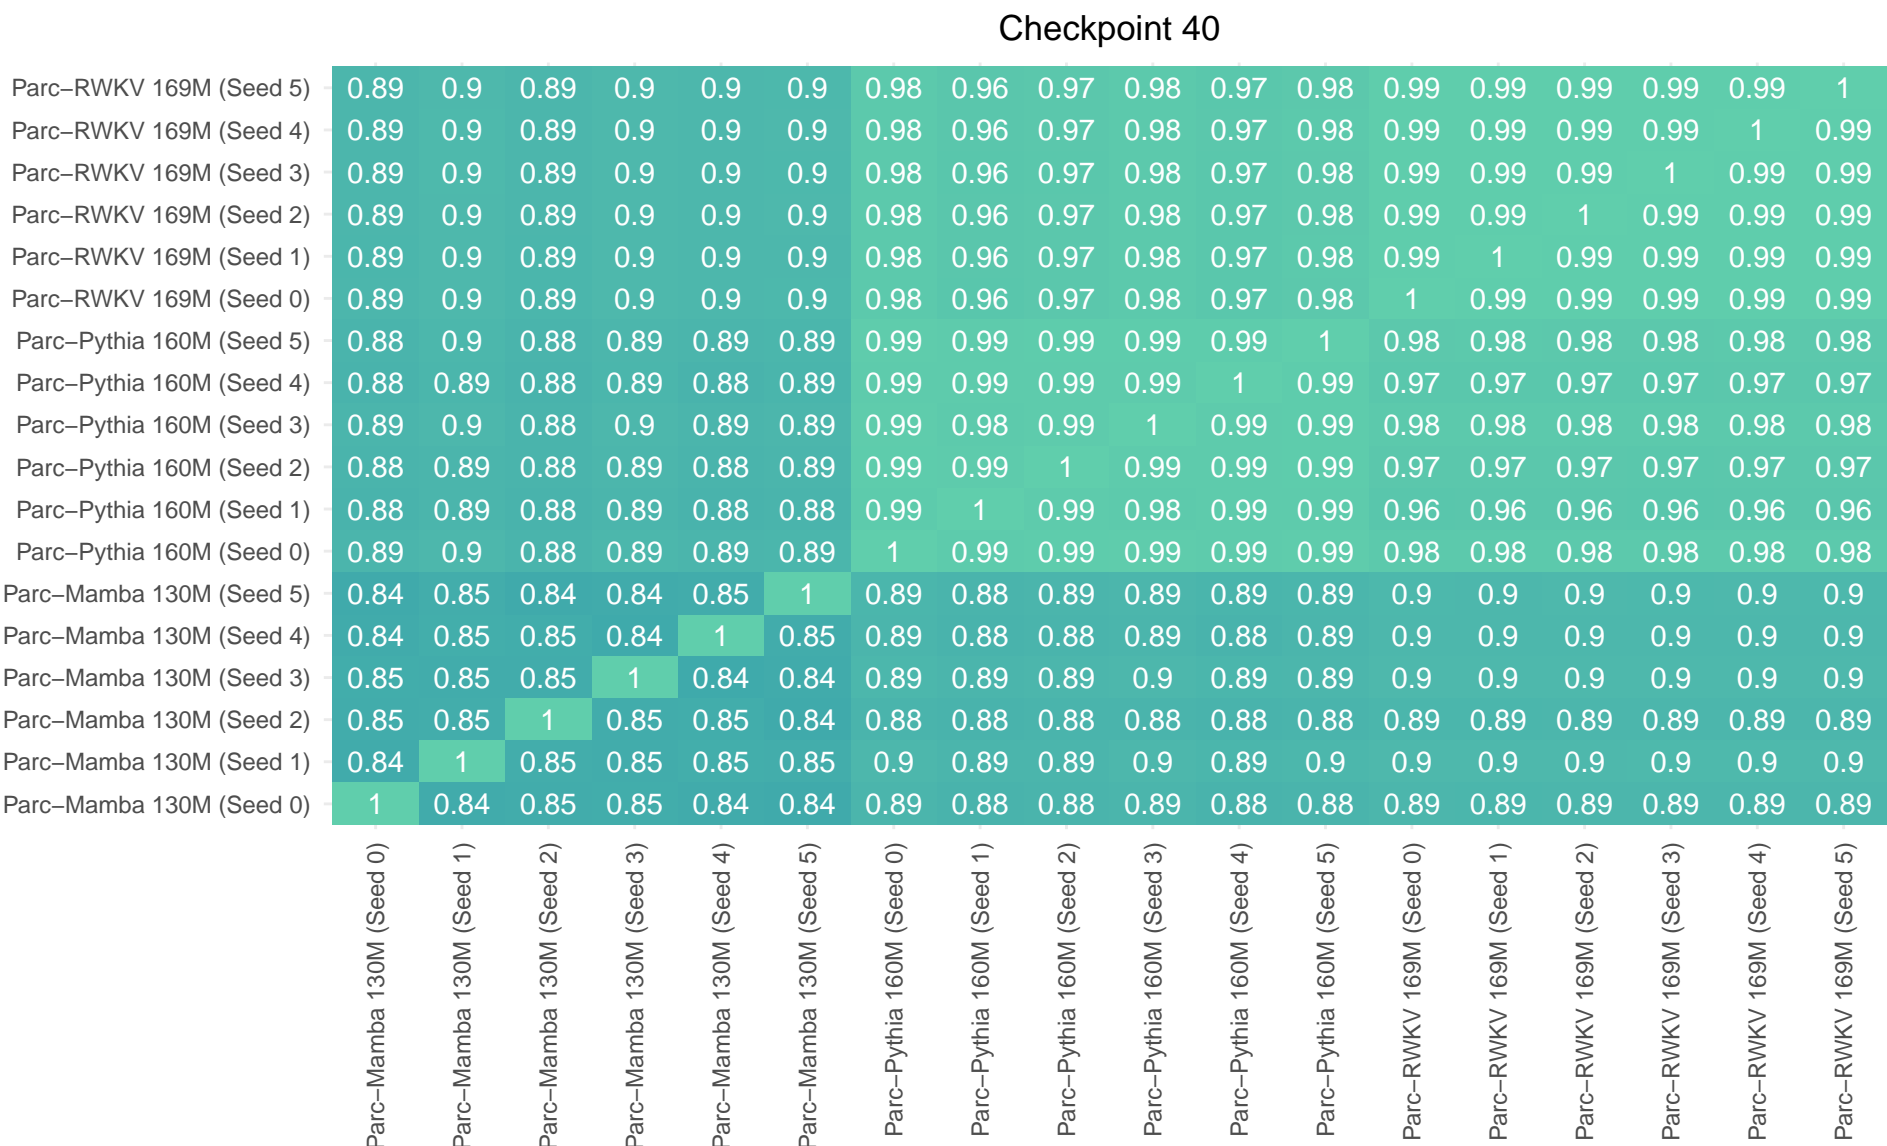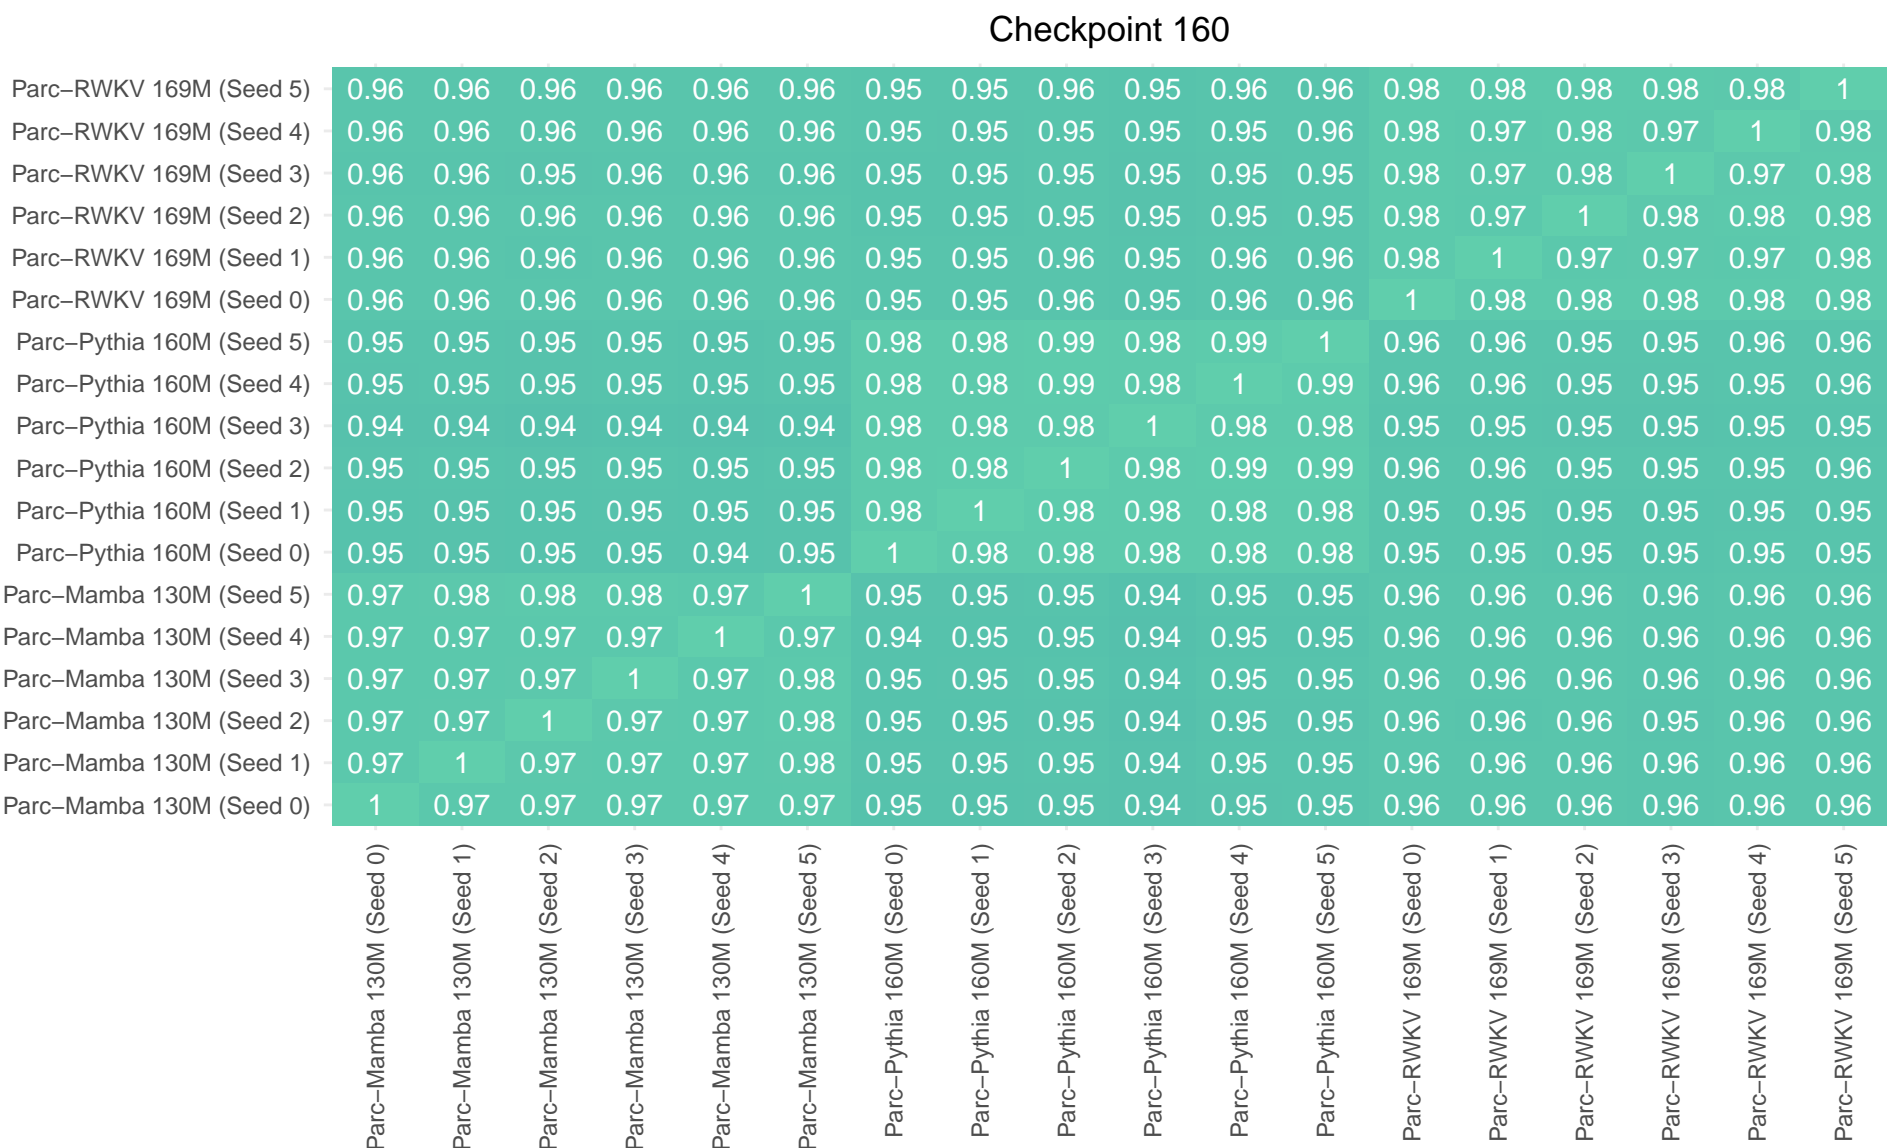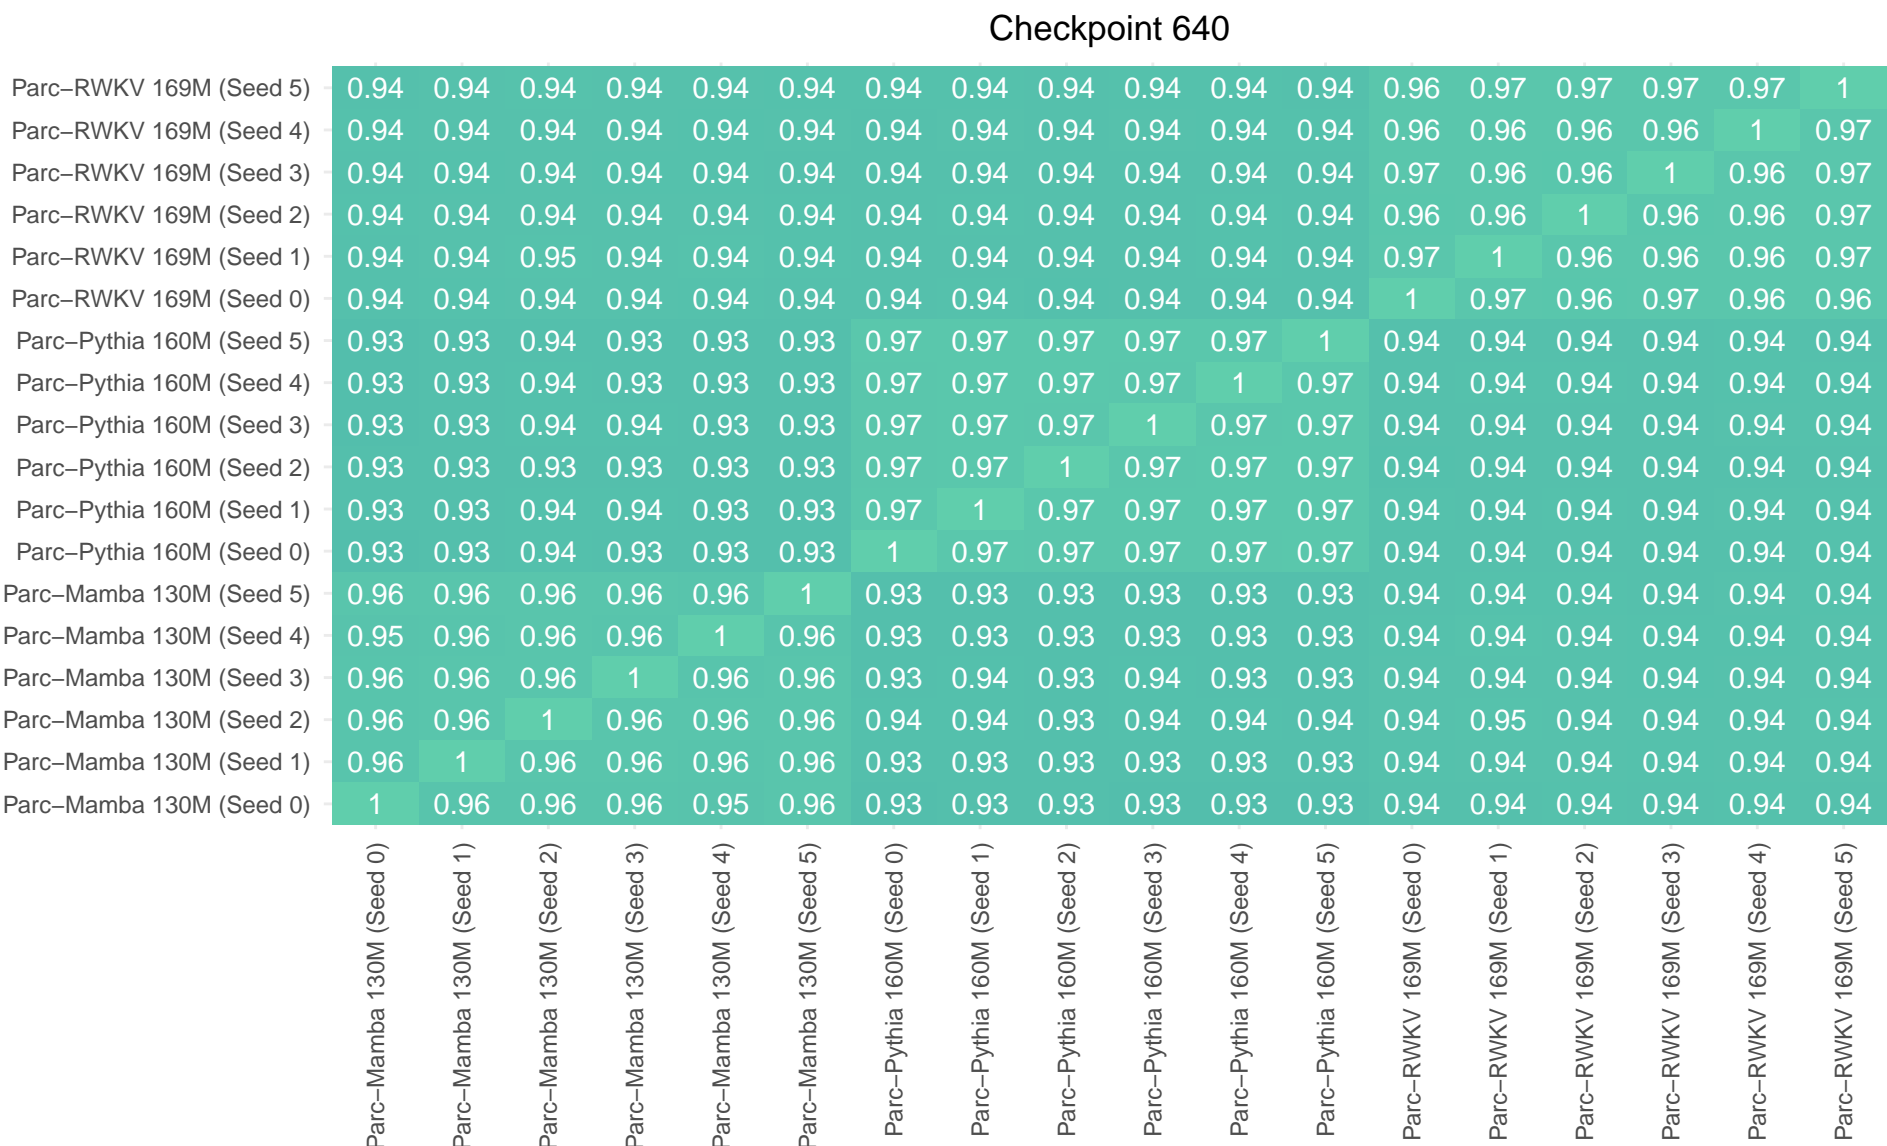

Supplement: supplementary_material [file intercorr.pdf › lm-behavioral-phases/analyses/intercorr.pdf]

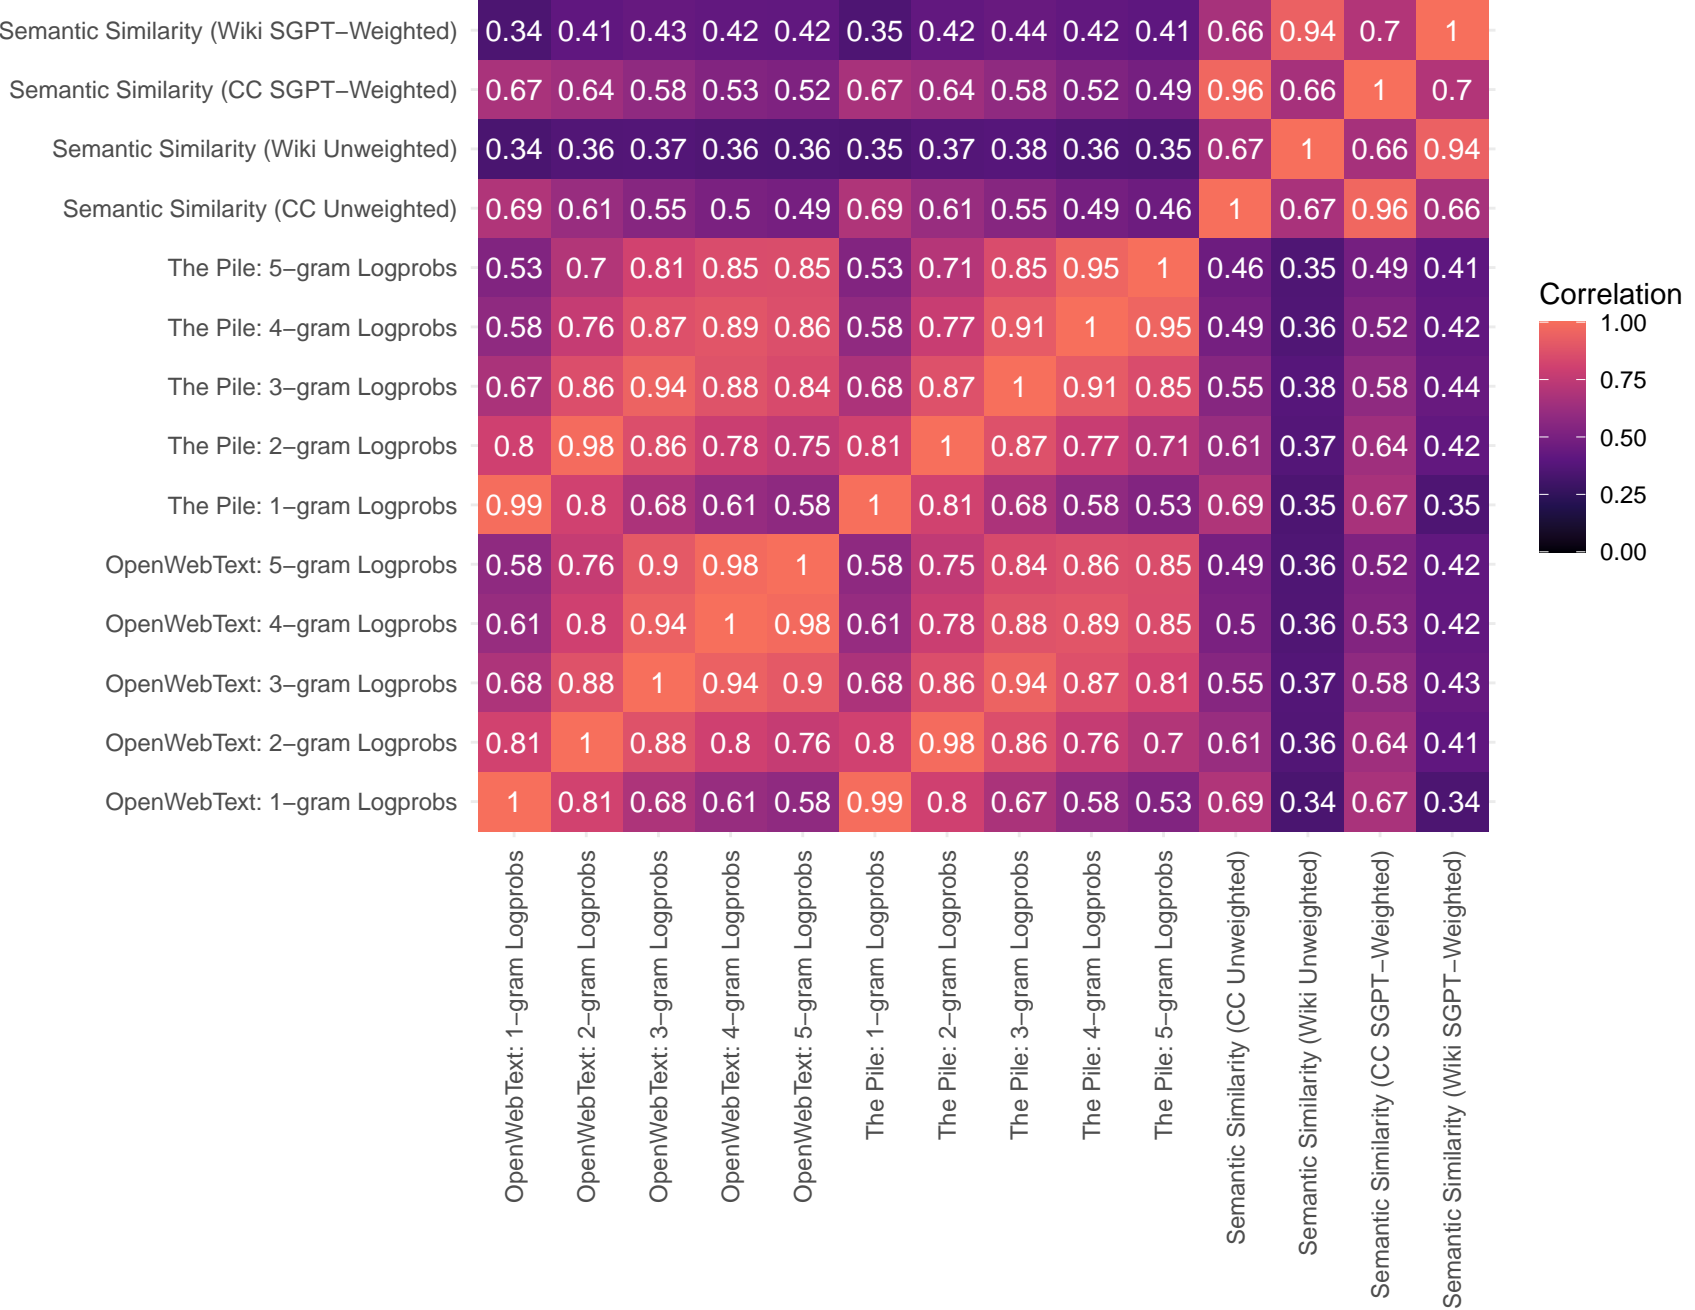

Supplement: supplementary_material [file pred_corrs.pdf › lm-behavioral-phases/analyses/pred_corrs.pdf]

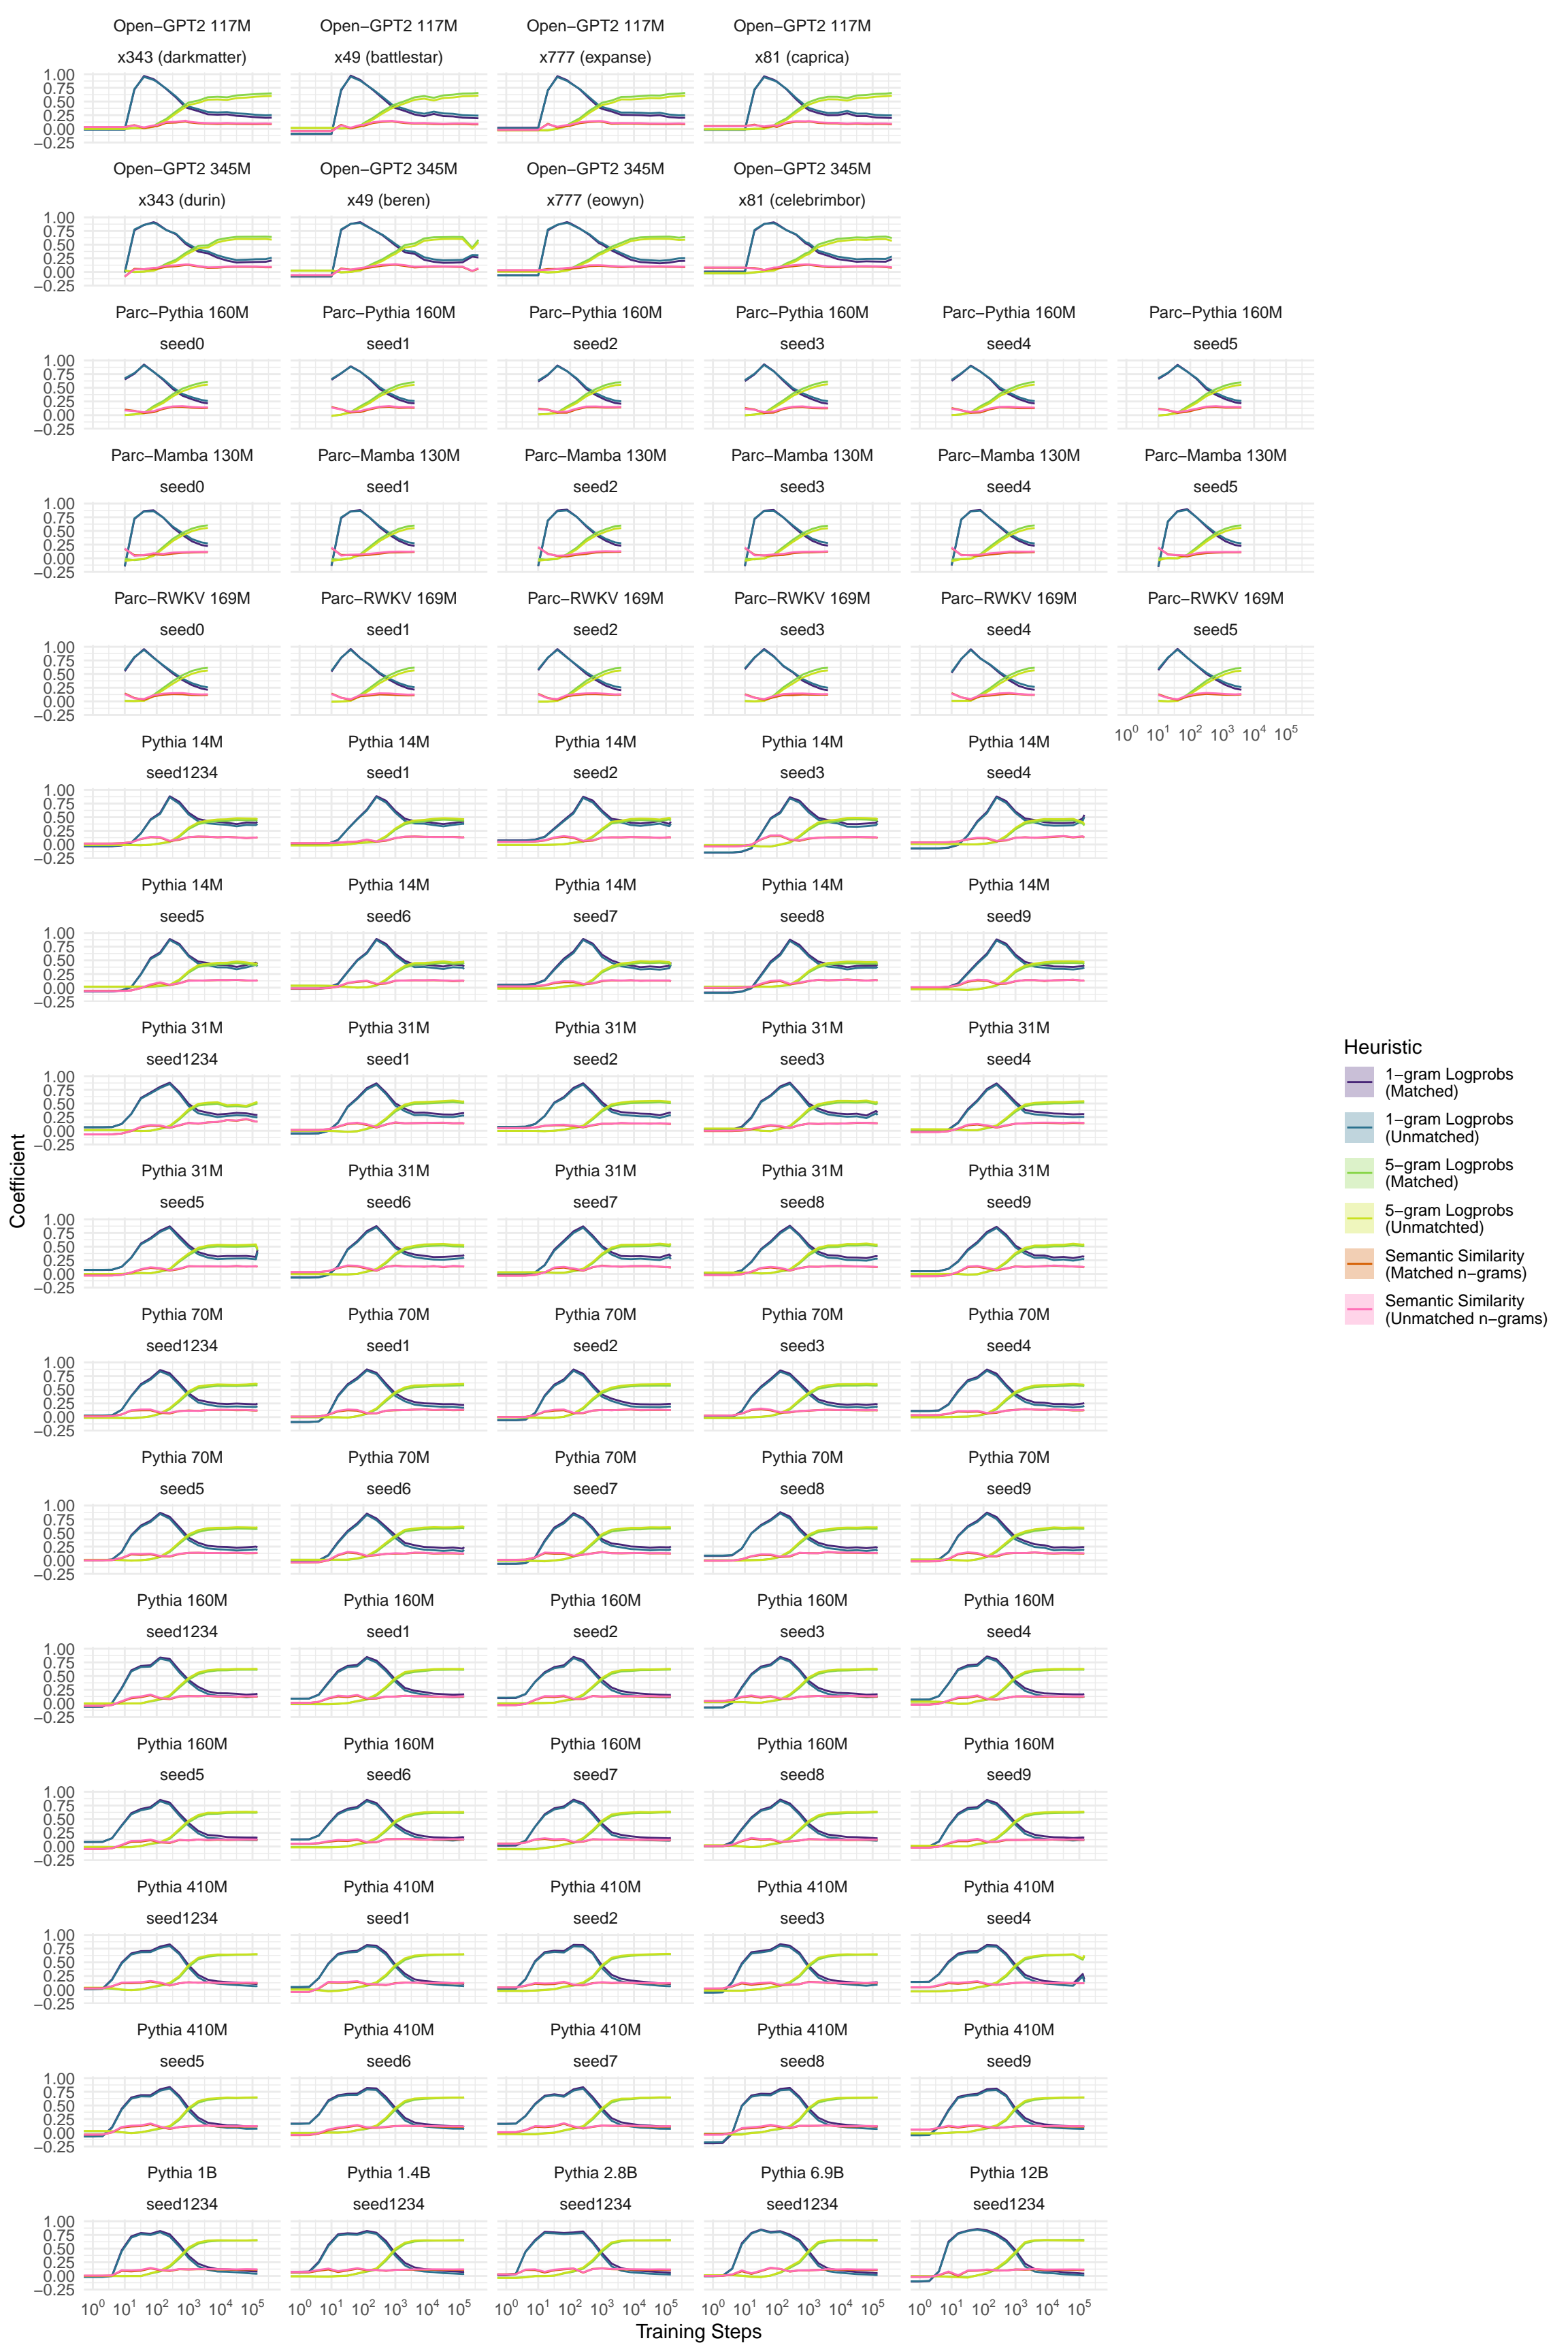

Supplement: supplementary_material [file preds_seed_ucdcc.pdf › lm-behavioral-phases/analyses/preds_seed_ucdcc.pdf]

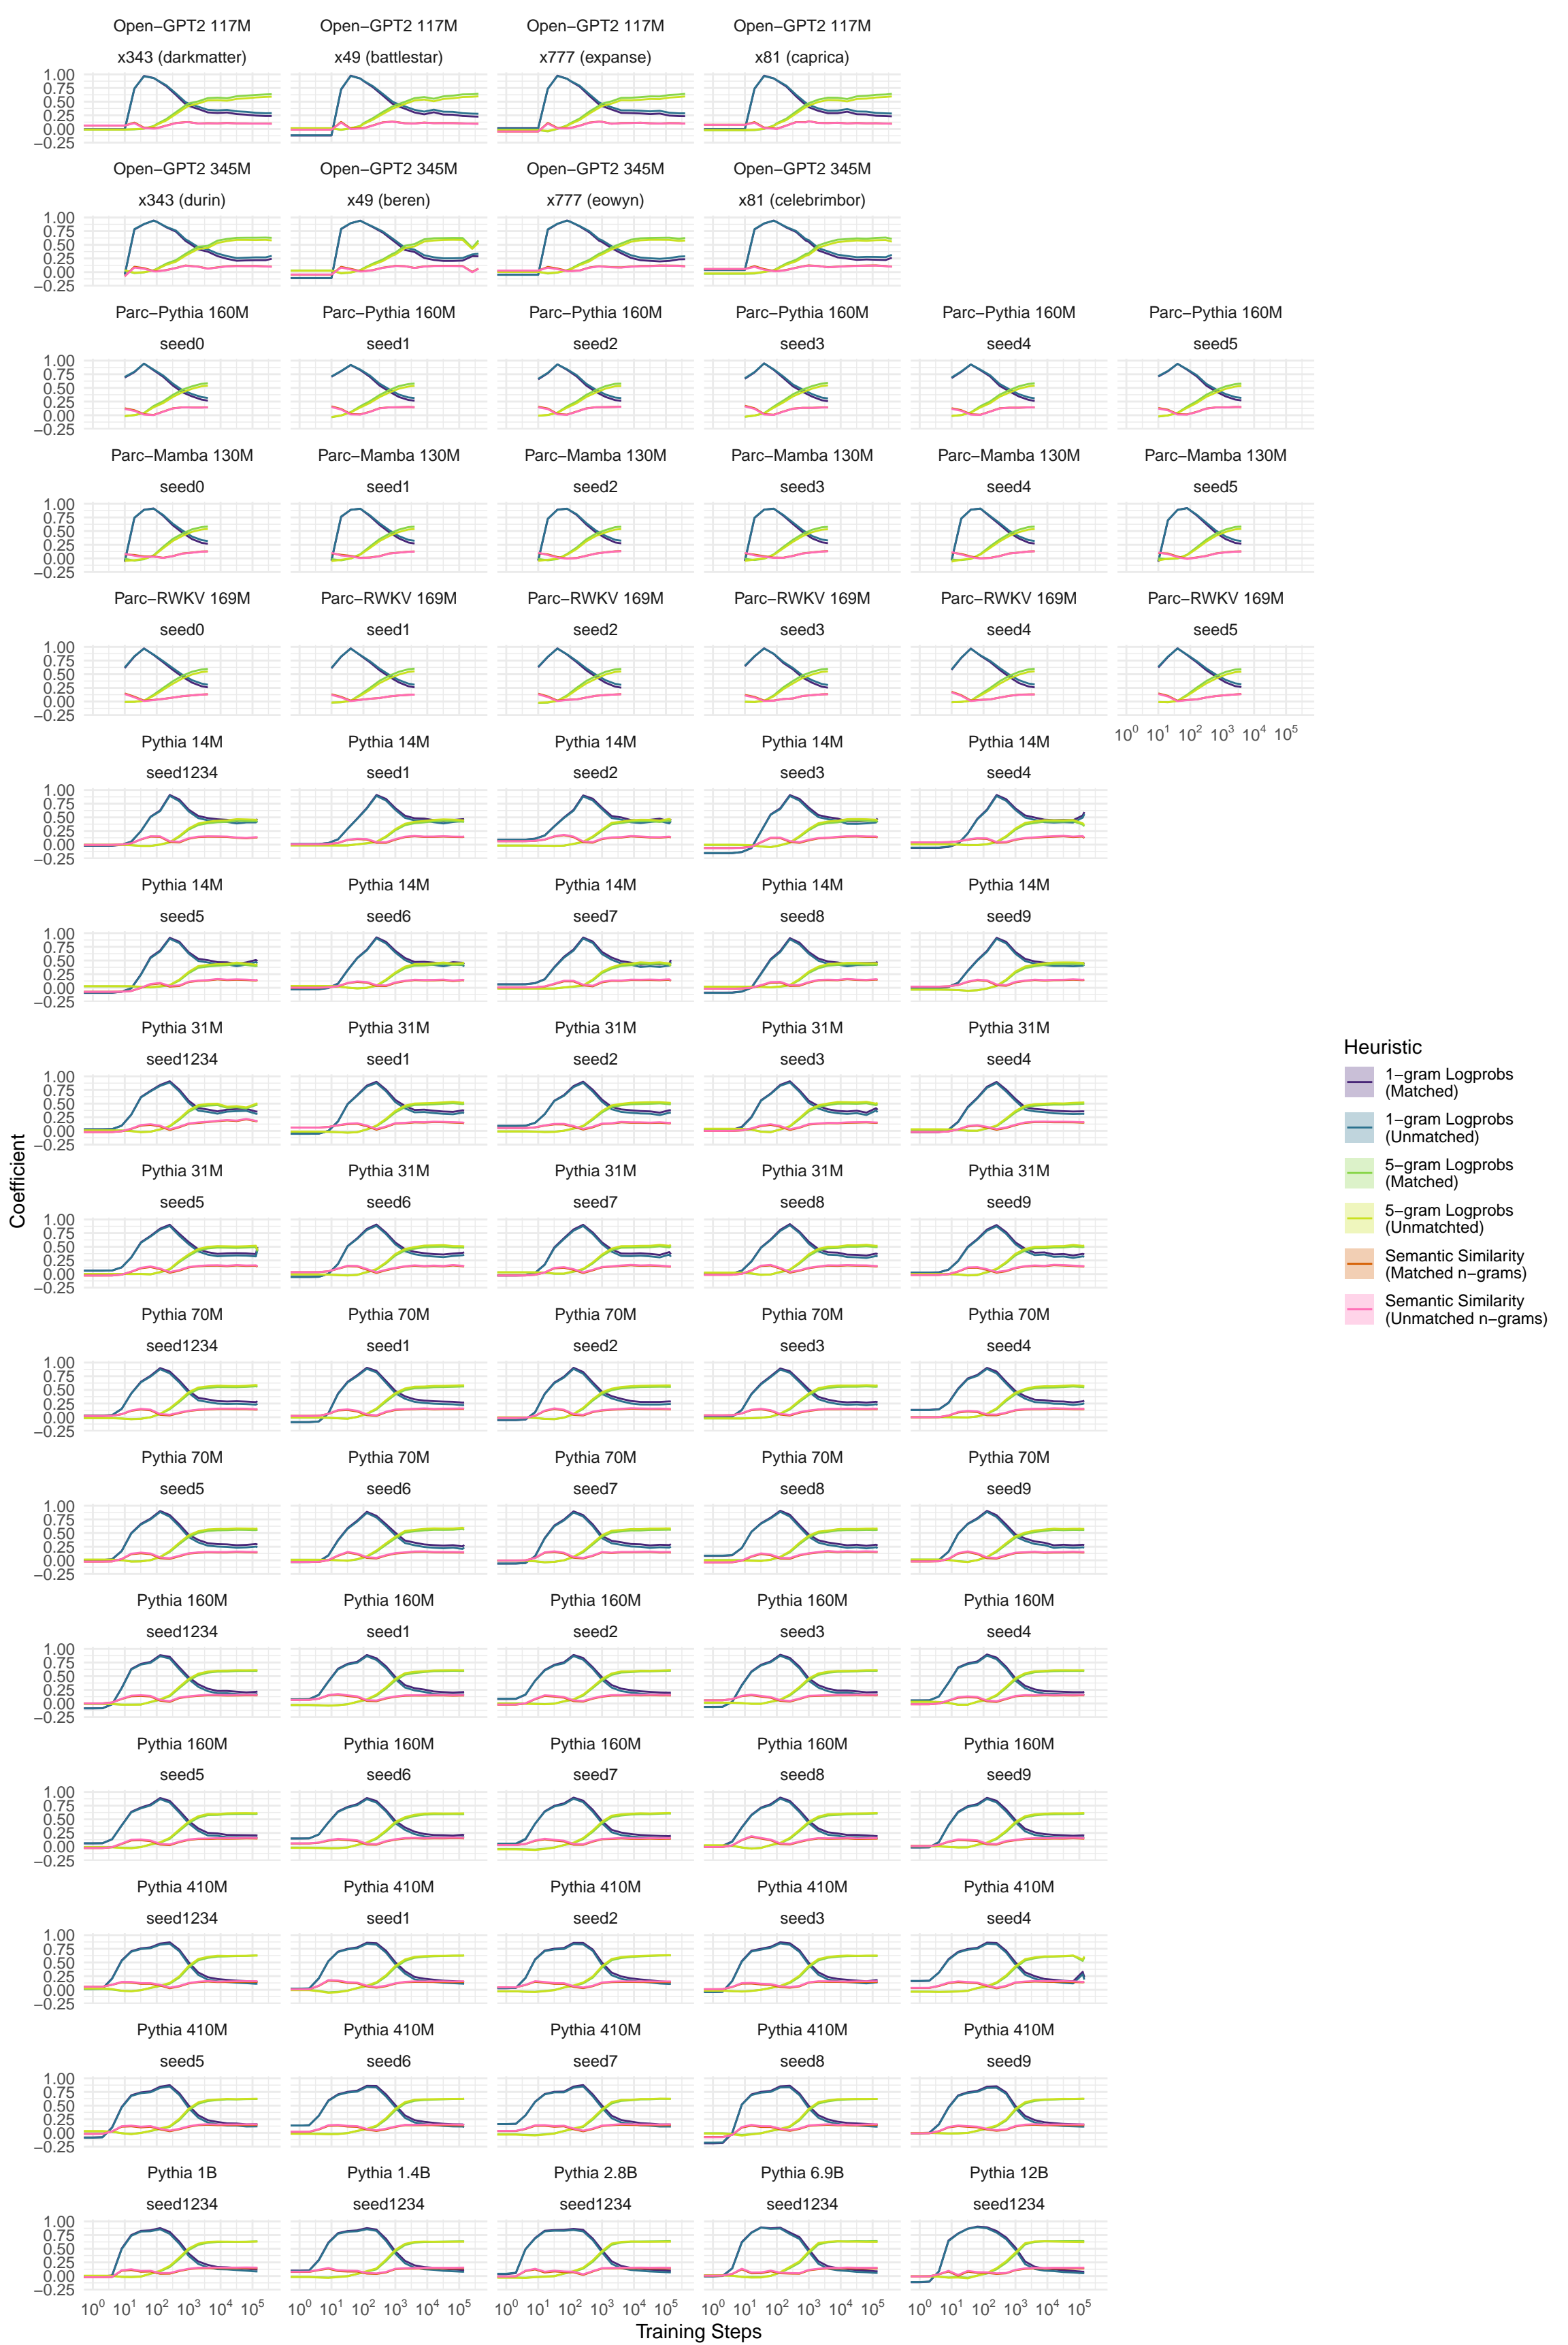

Supplement: supplementary_material [file preds_seed_ucdwiki.pdf › lm-behavioral-phases/analyses/preds_seed_ucdwiki.pdf]

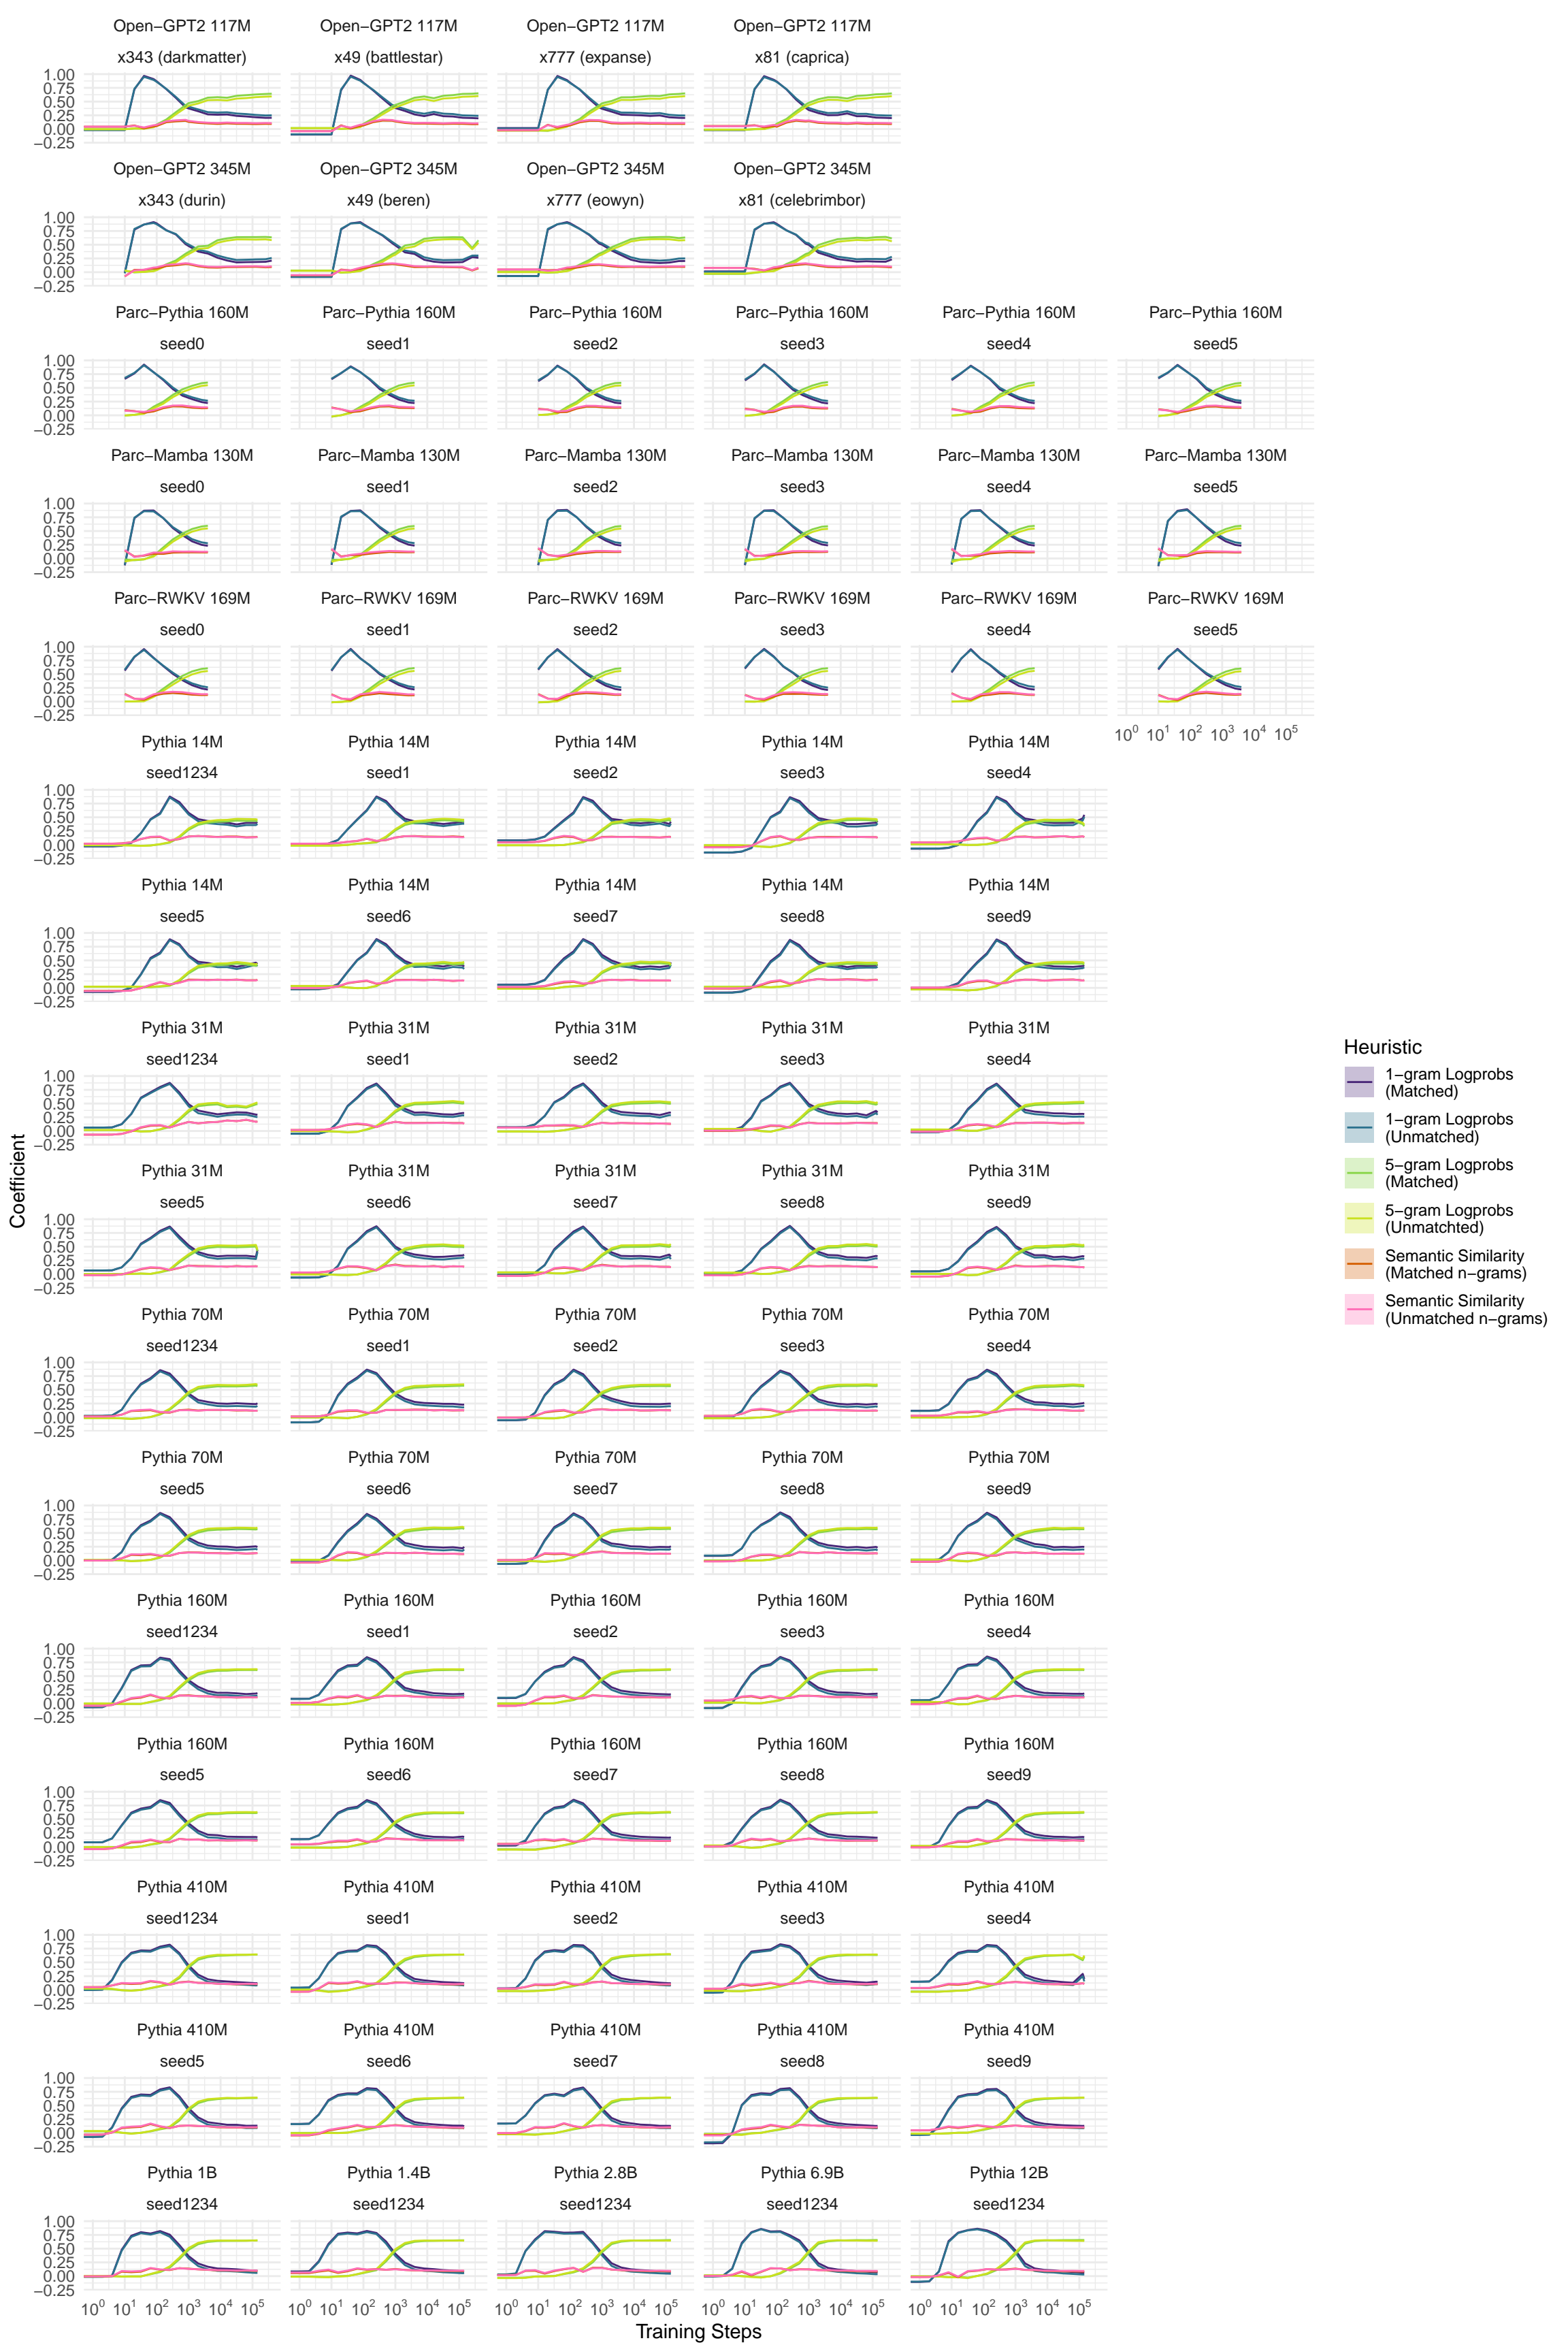

Supplement: supplementary_material [file preds_seed_wcdcc.pdf › lm-behavioral-phases/analyses/preds_seed_wcdcc.pdf]

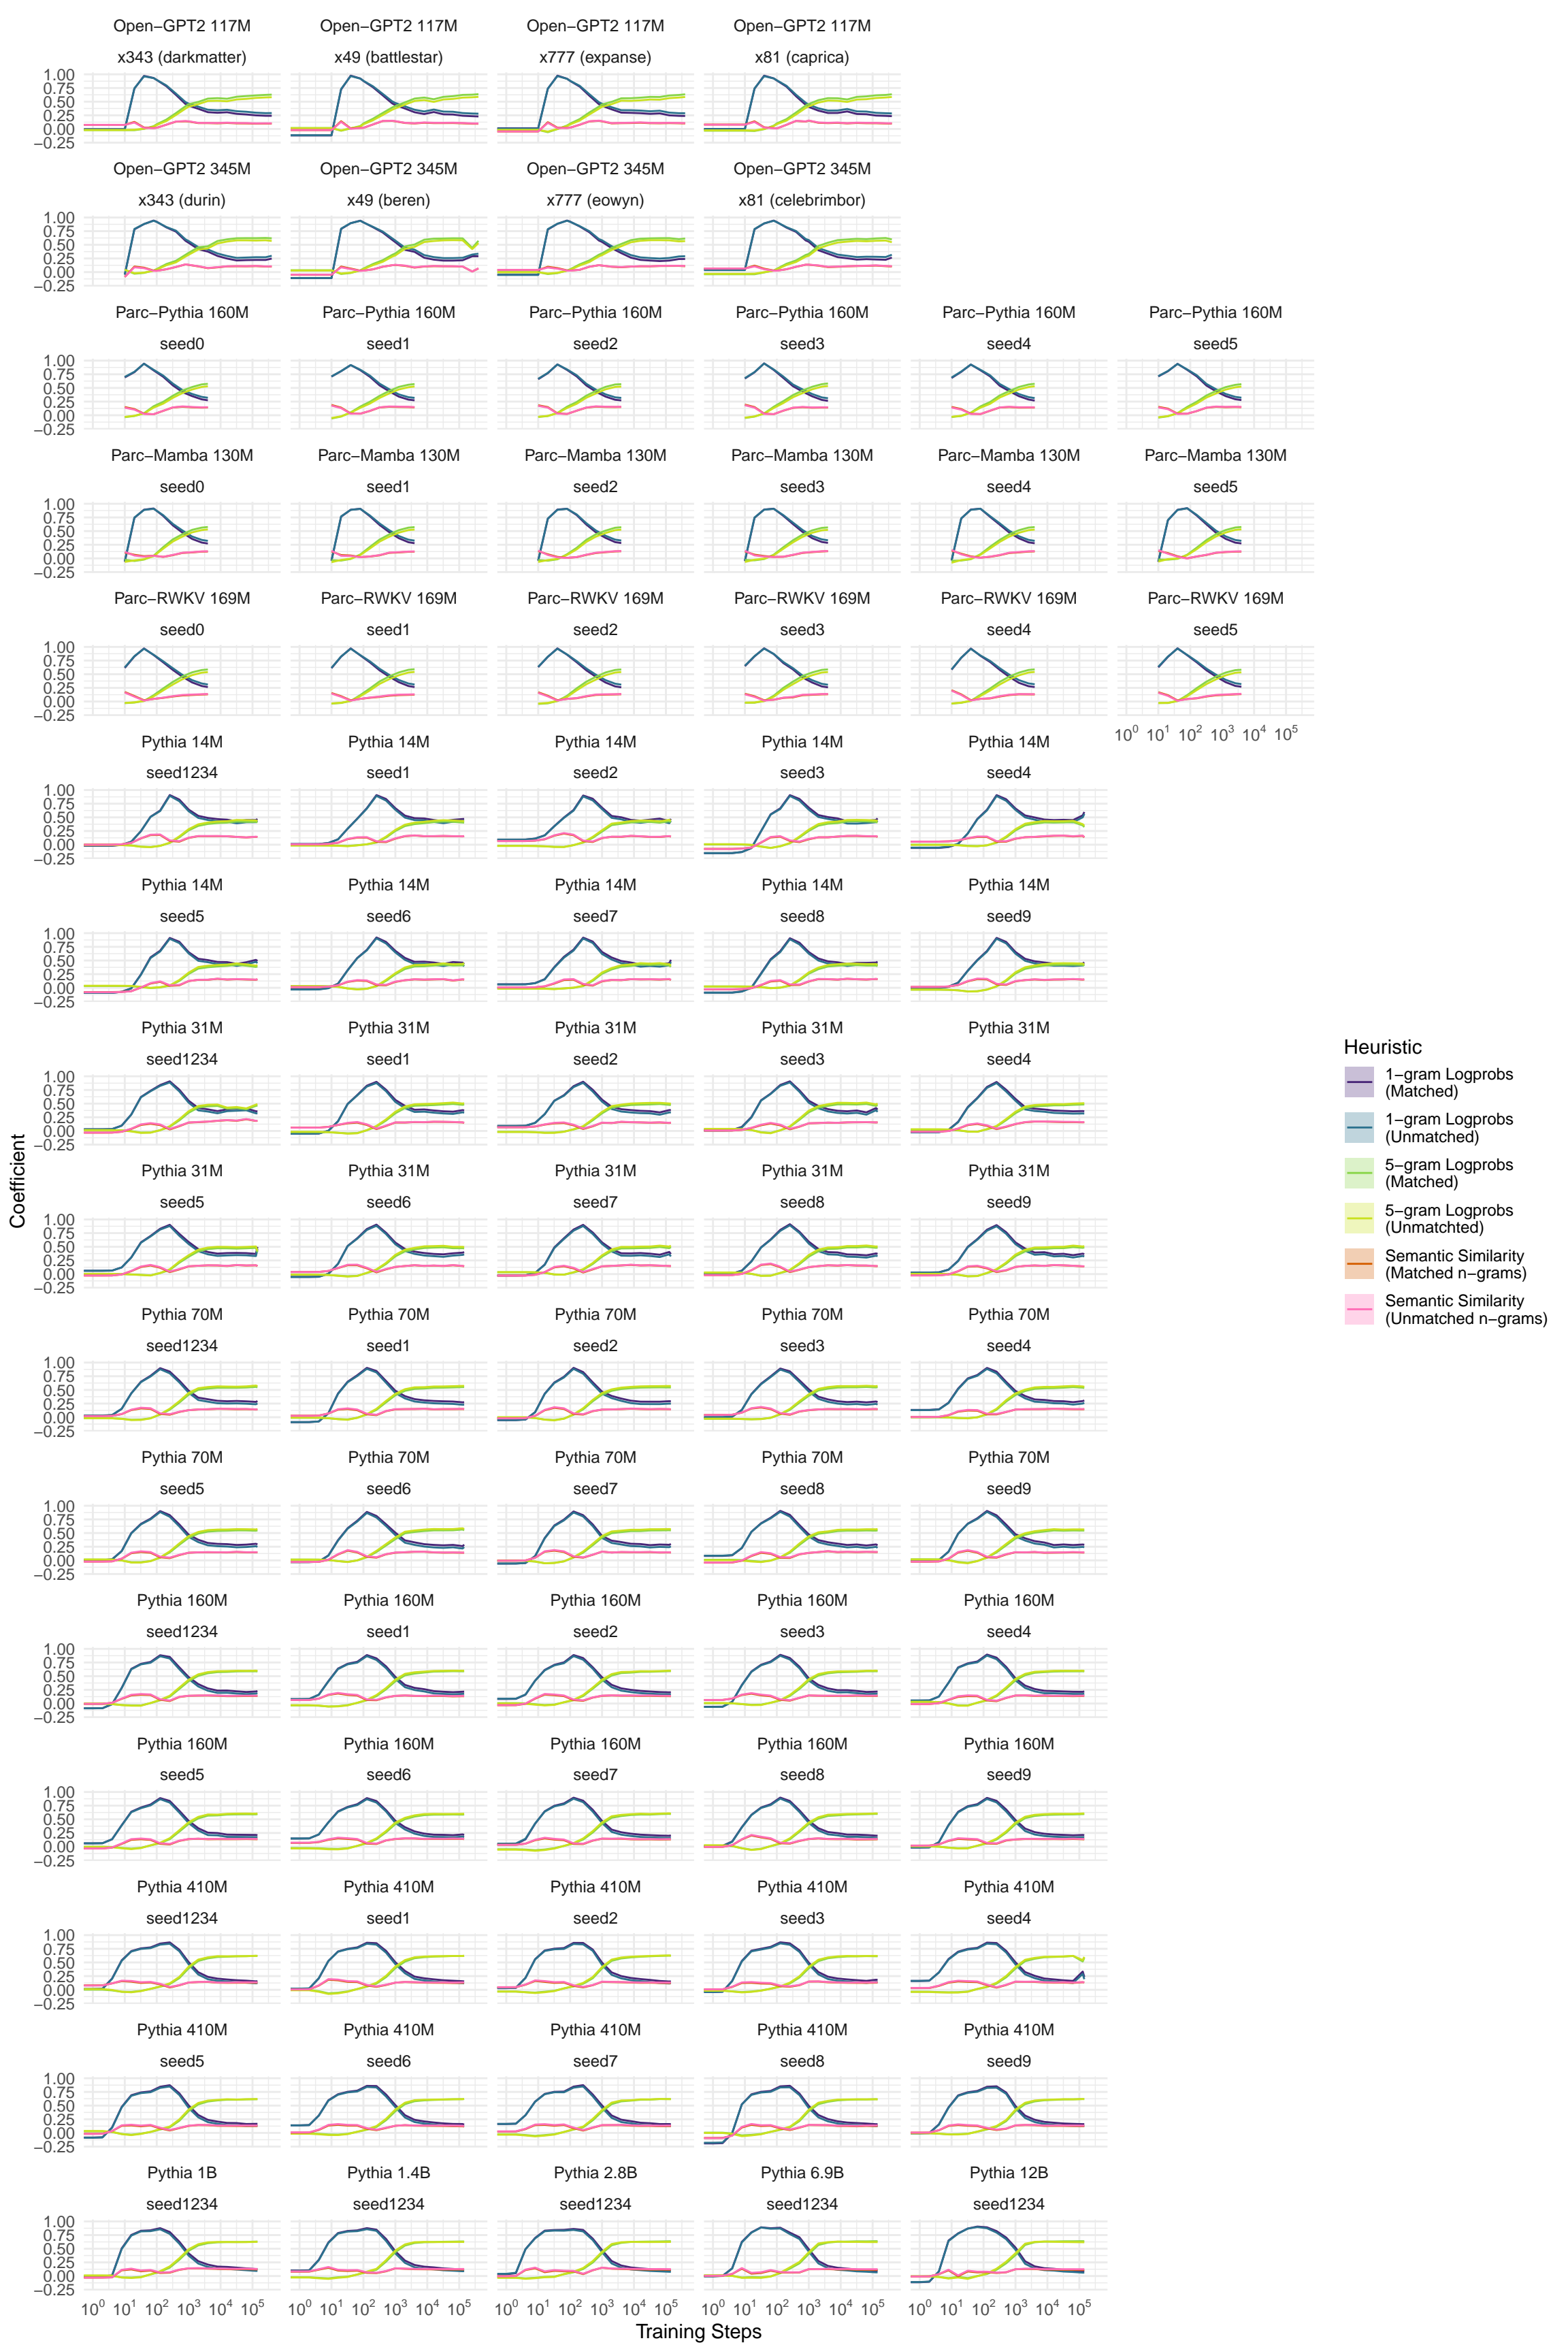

Supplement: supplementary_material [file preds_seed_wcdwiki.pdf › lm-behavioral-phases/analyses/preds_seed_wcdwiki.pdf]

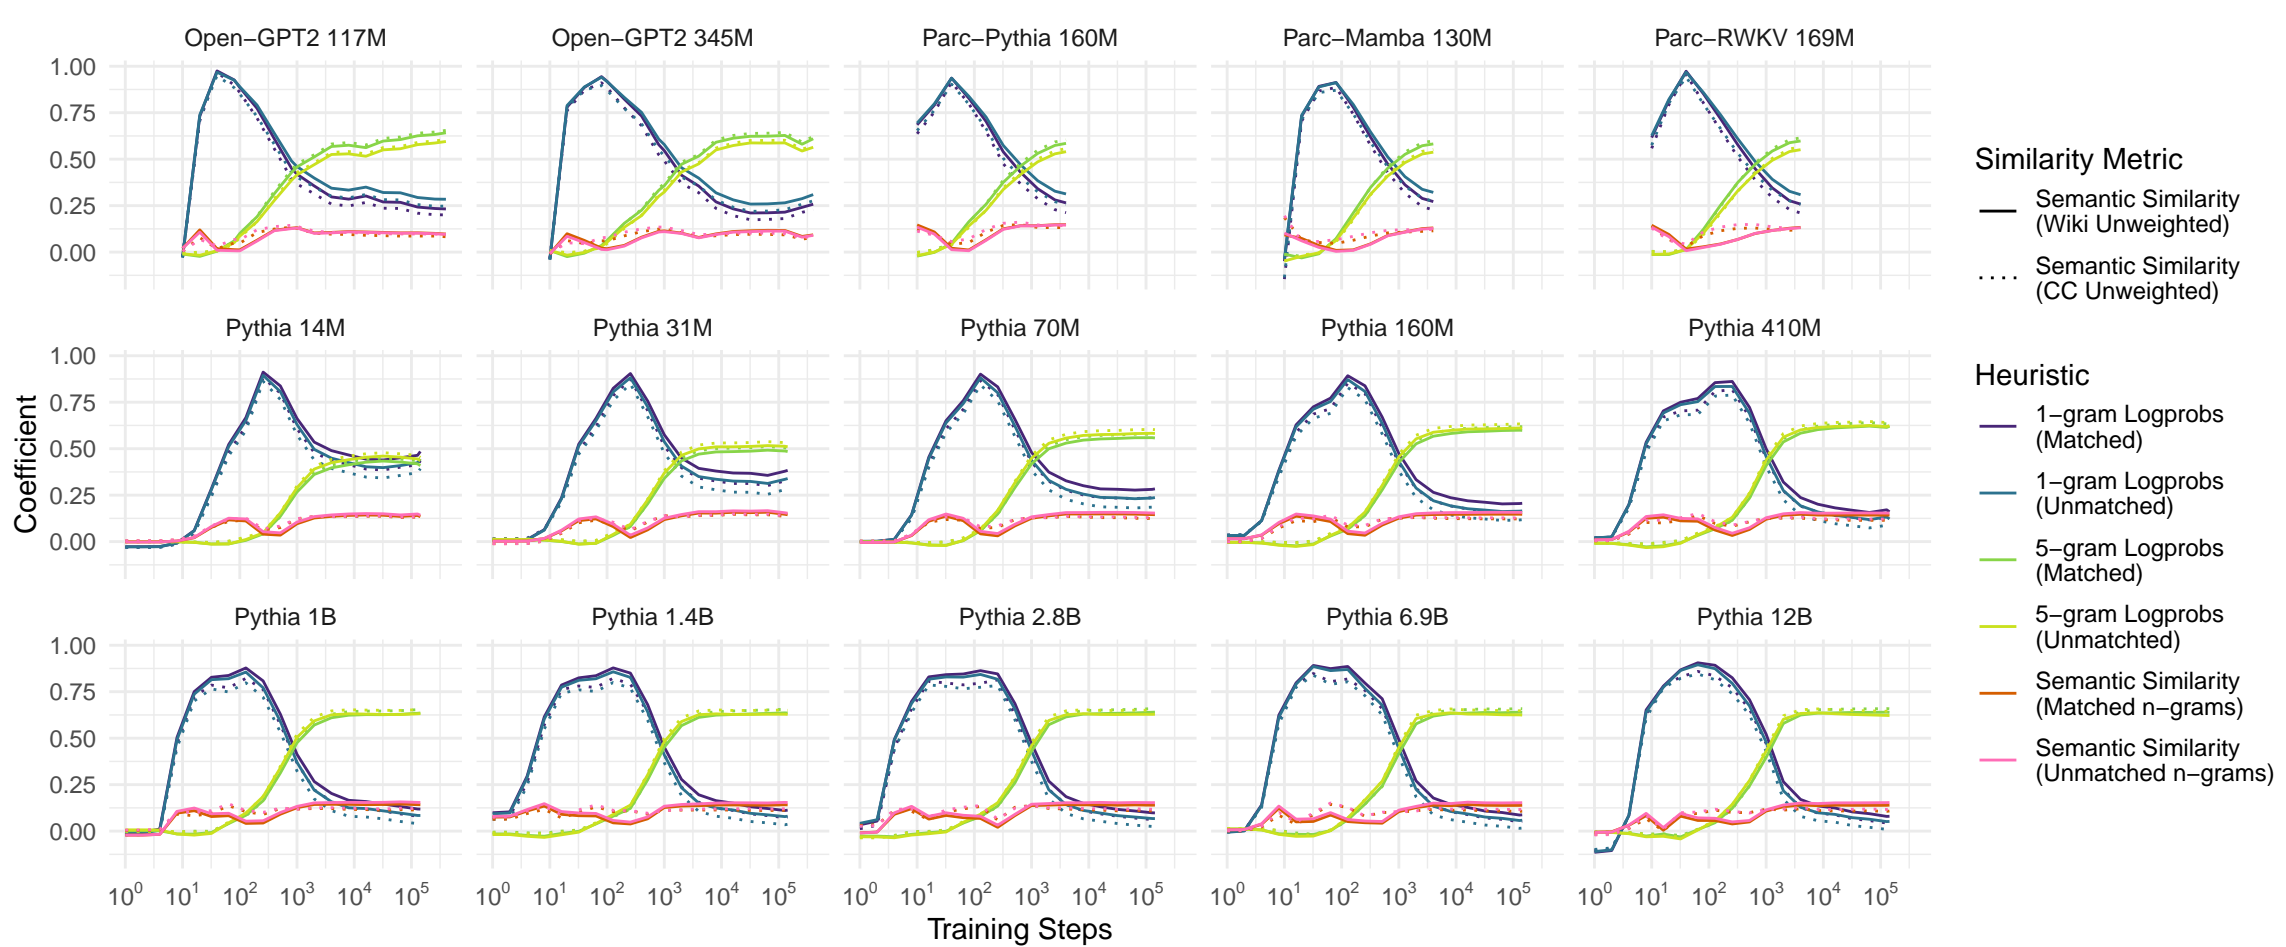

Supplement: supplementary_material [file preds_unweighted.pdf › lm-behavioral-phases/analyses/preds_unweighted.pdf]

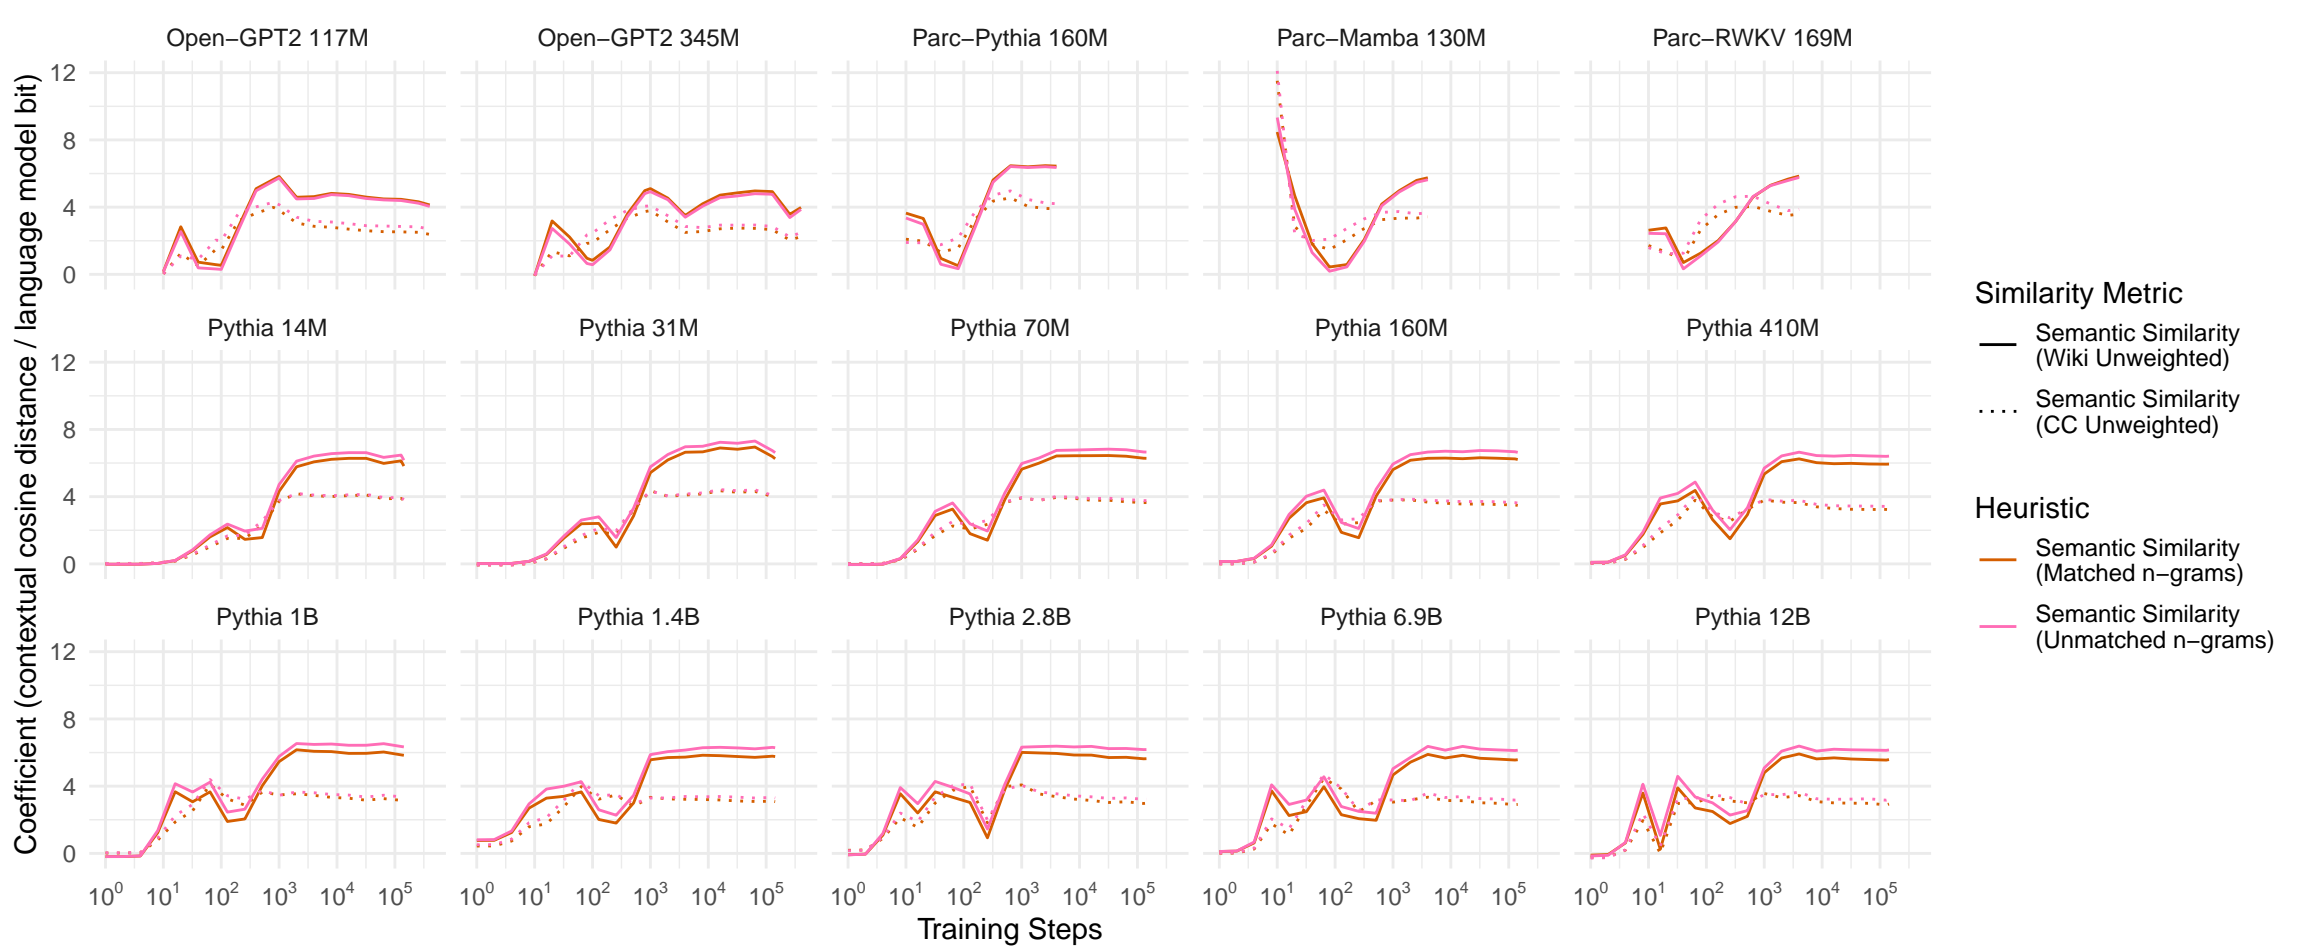

Supplement: supplementary_material [file preds_unweighted_unnormalized_distances.pdf › lm-behavioral-phases/analyses/preds_unweighted_unnormalized_distances.pdf]

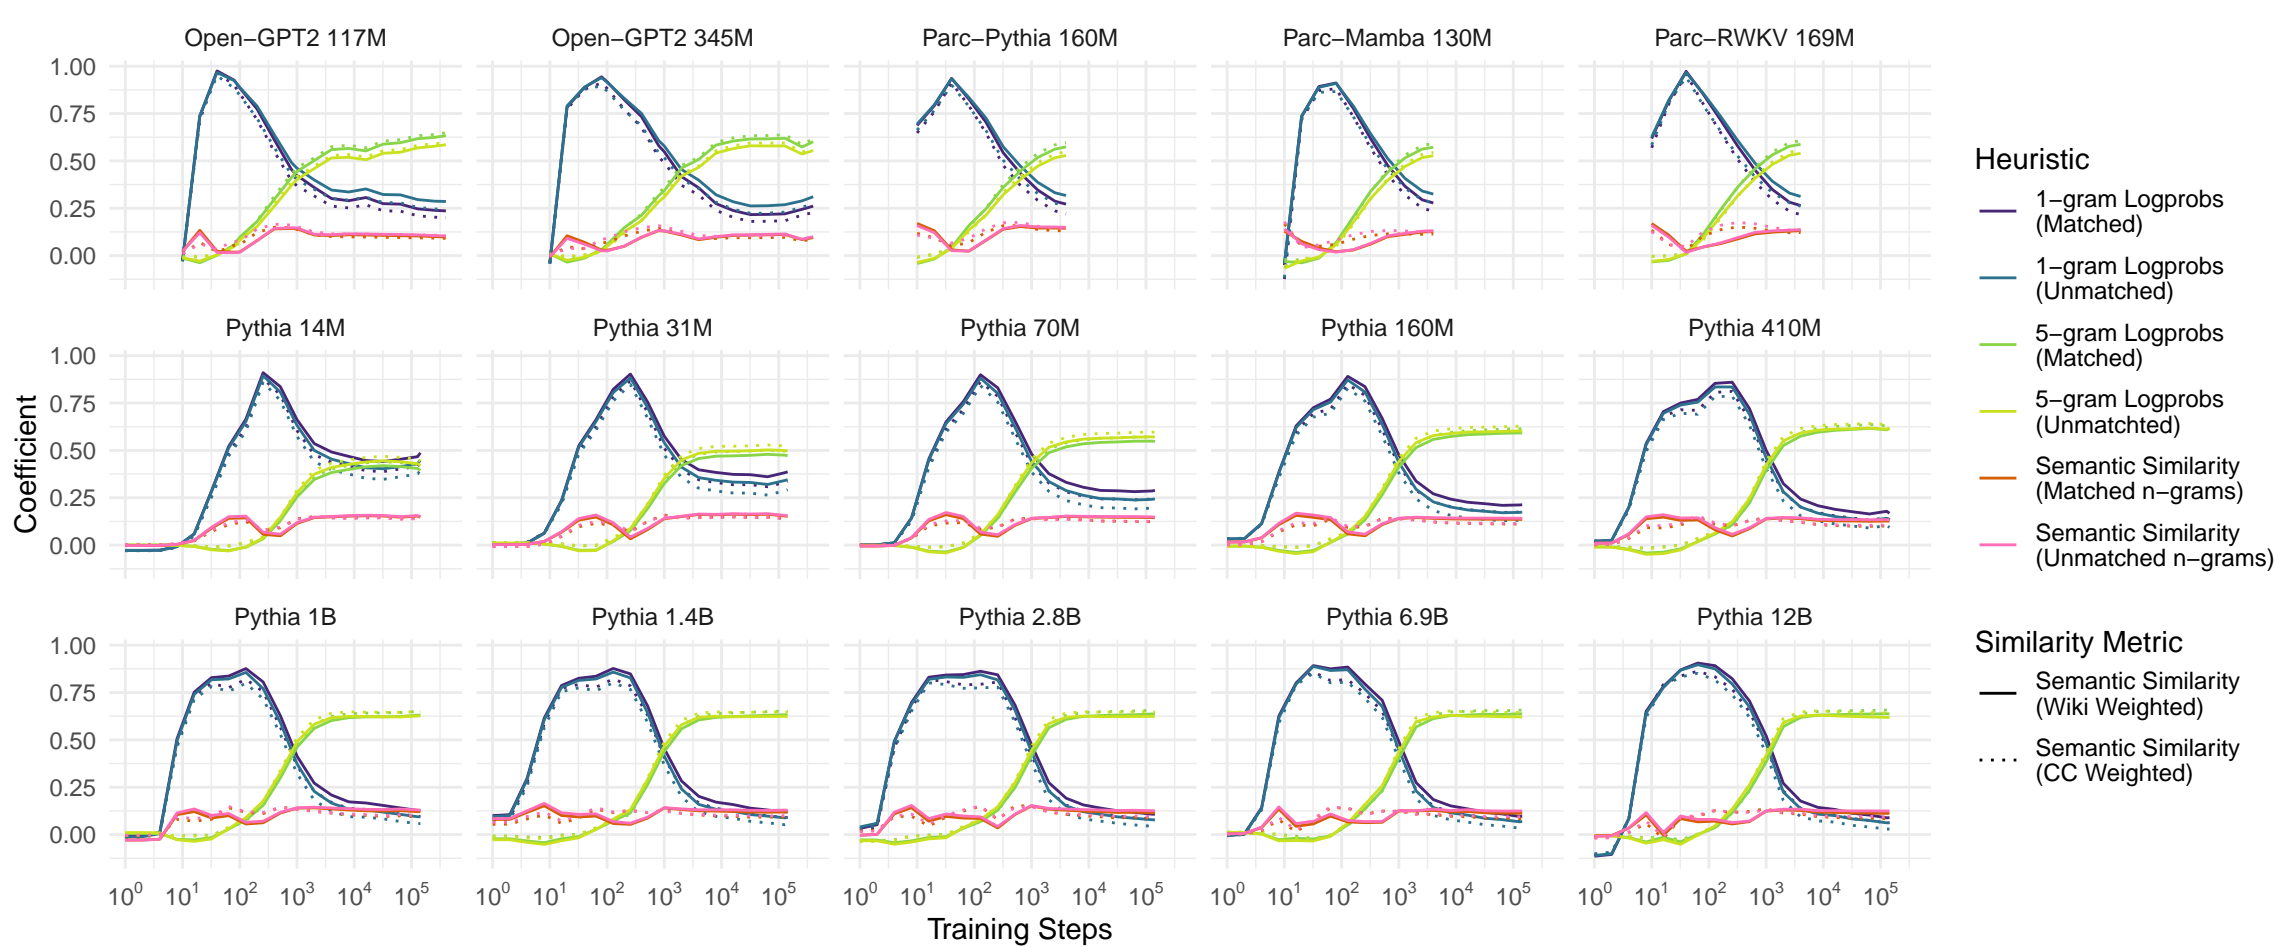

Supplement: supplementary_material [file preds_weighted.pdf › lm-behavioral-phases/analyses/preds_weighted.pdf]

Coefficient (contextual cosine distance / language model bit)

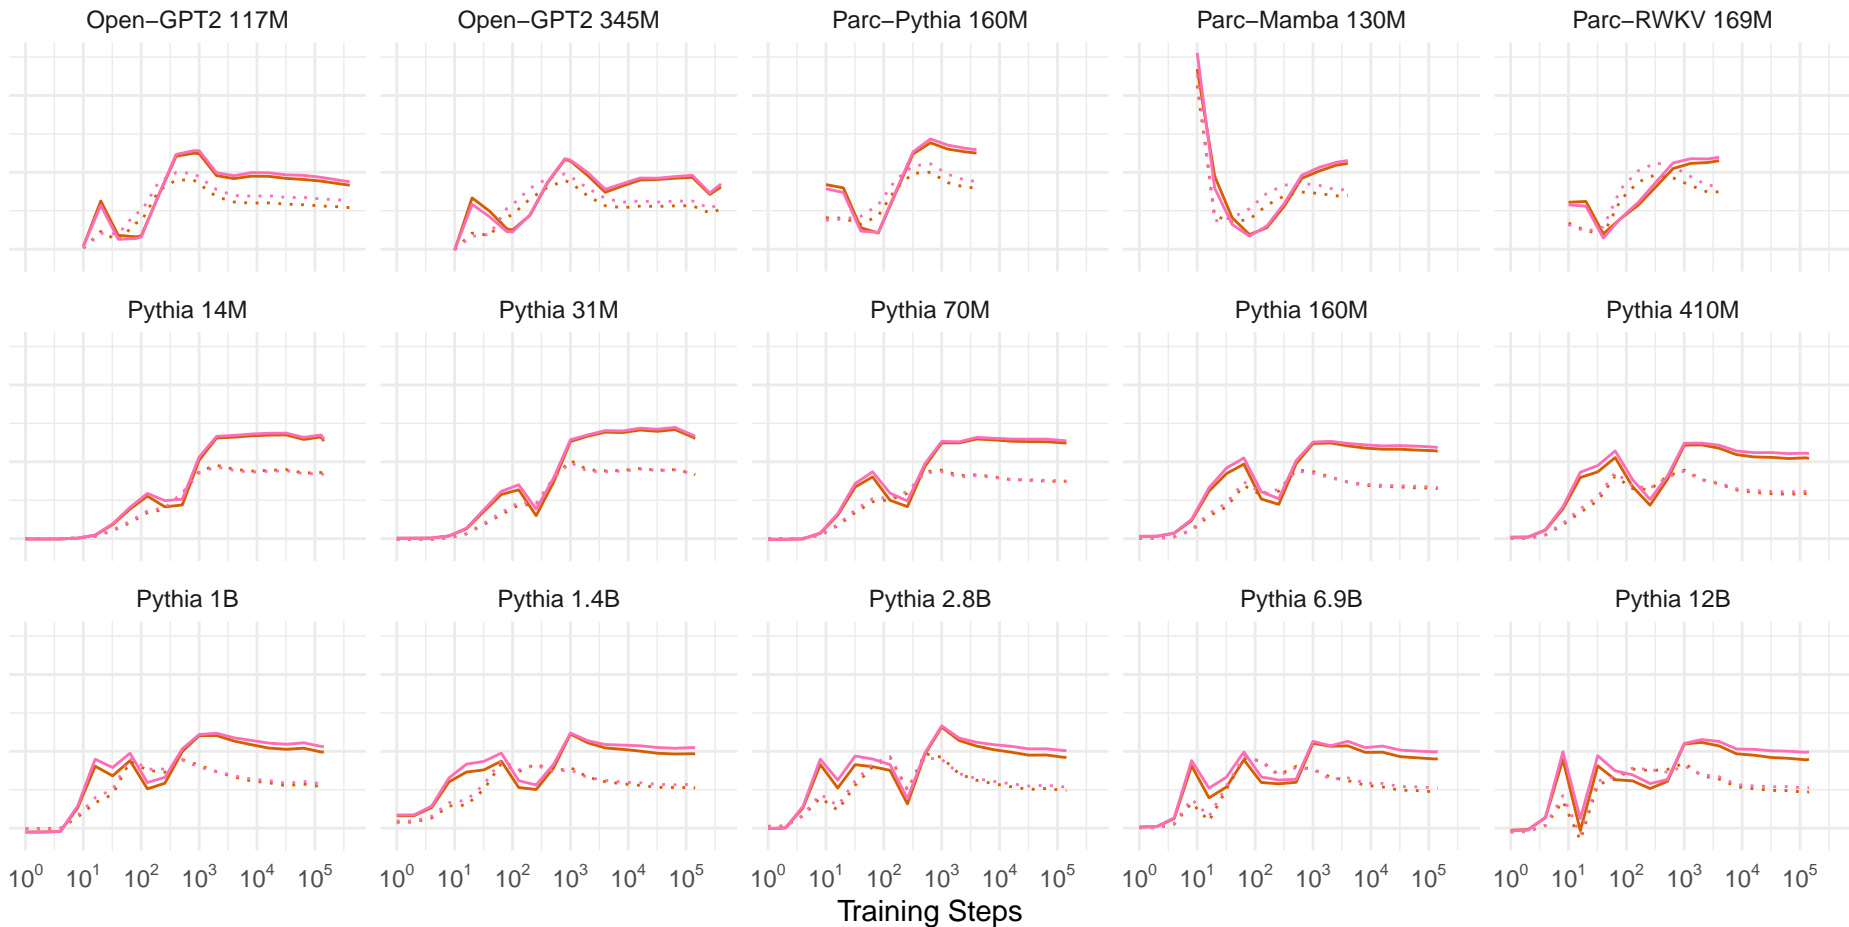

Supplement: supplementary_material [file preds_weighted_unnormalized_distances.pdf › lm-behavioral-phases/analyses/preds_weighted_unnormalized_distances.pdf]

Coefficient ( $n$ -gram bits / language model bit)

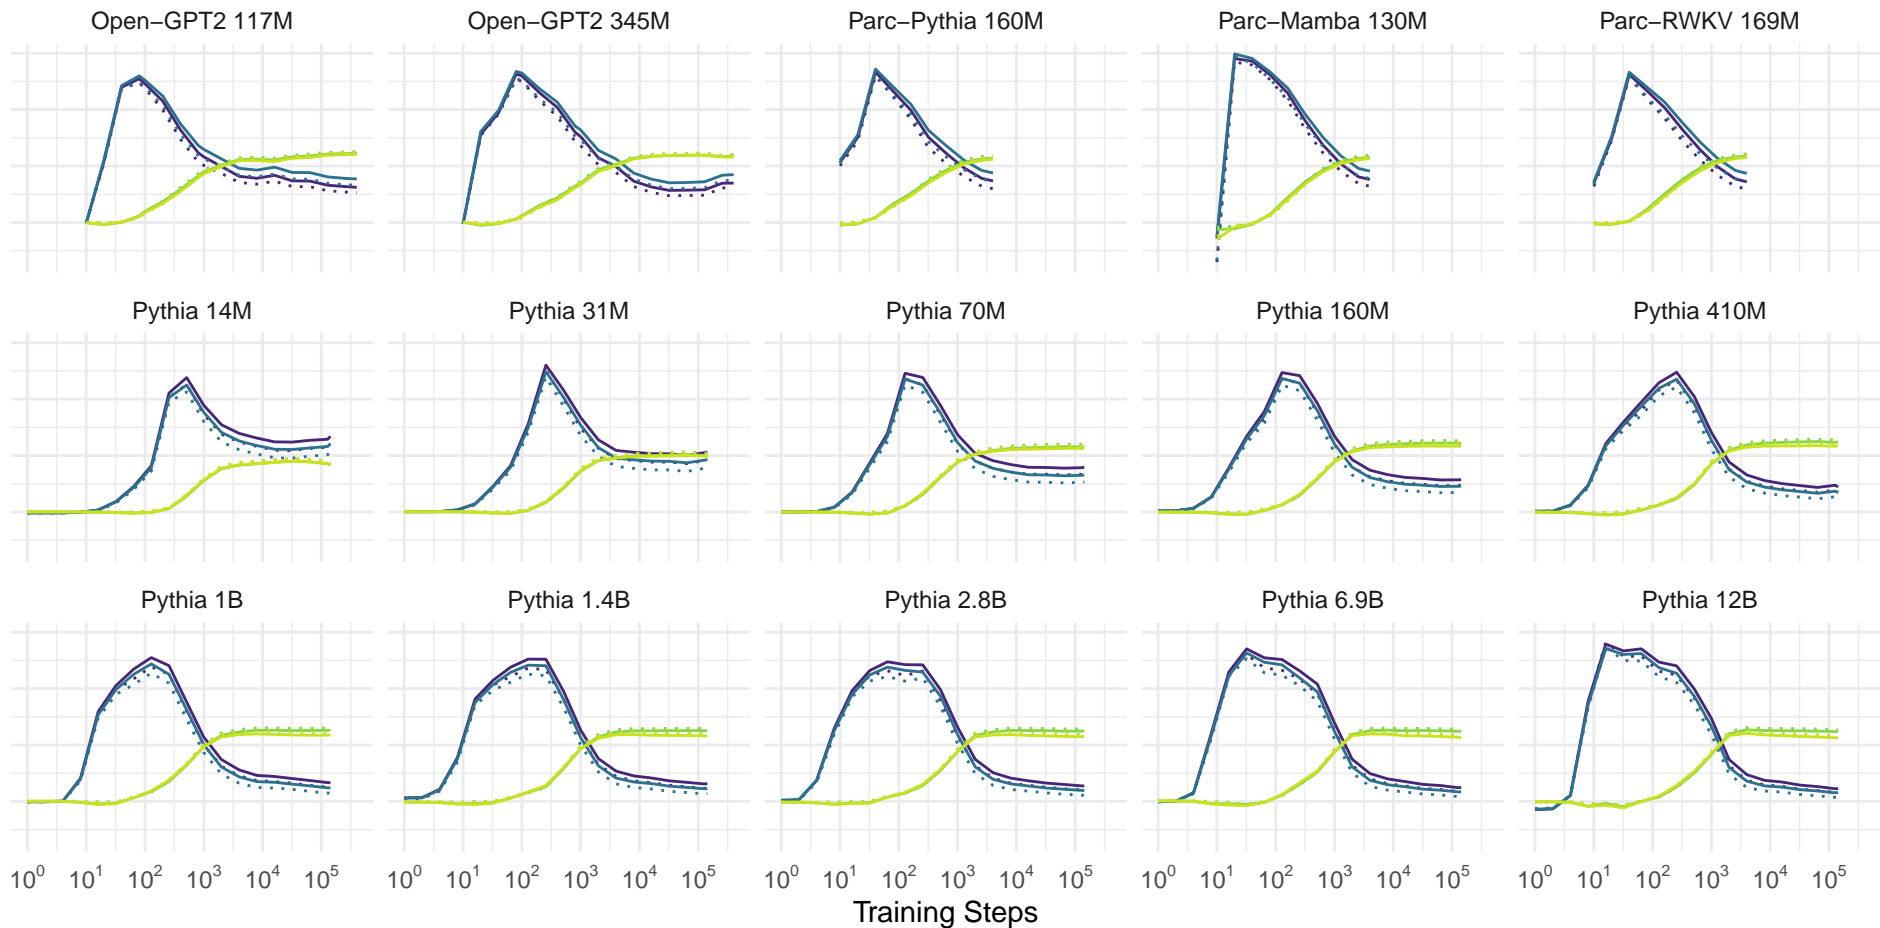

Supplement: supplementary_material [file preds_weighted_unnormalized_ngrams.pdf › lm-behavioral-phases/analyses/preds_weighted_unnormalized_ngrams.pdf]

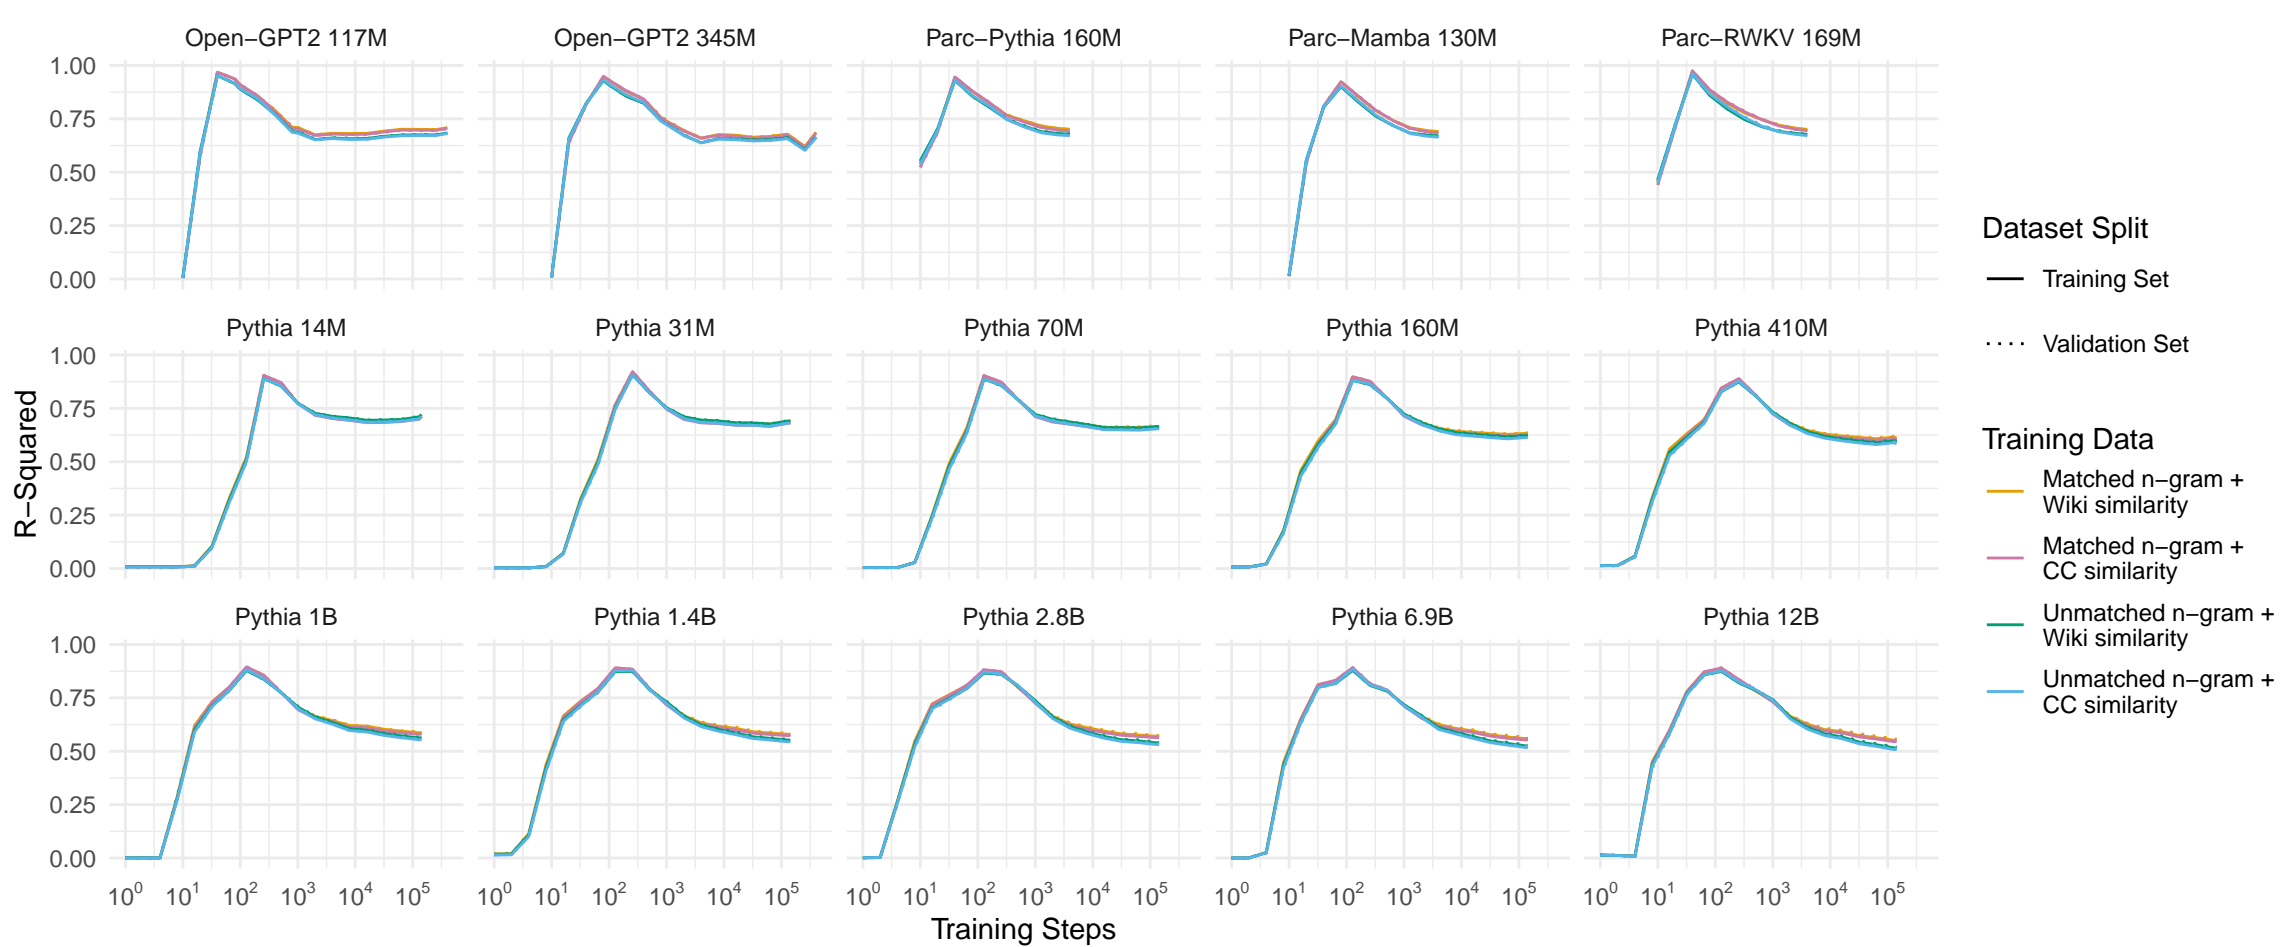

Supplement: supplementary_material [file rsq.pdf › lm-behavioral-phases/analyses/rsq.pdf]

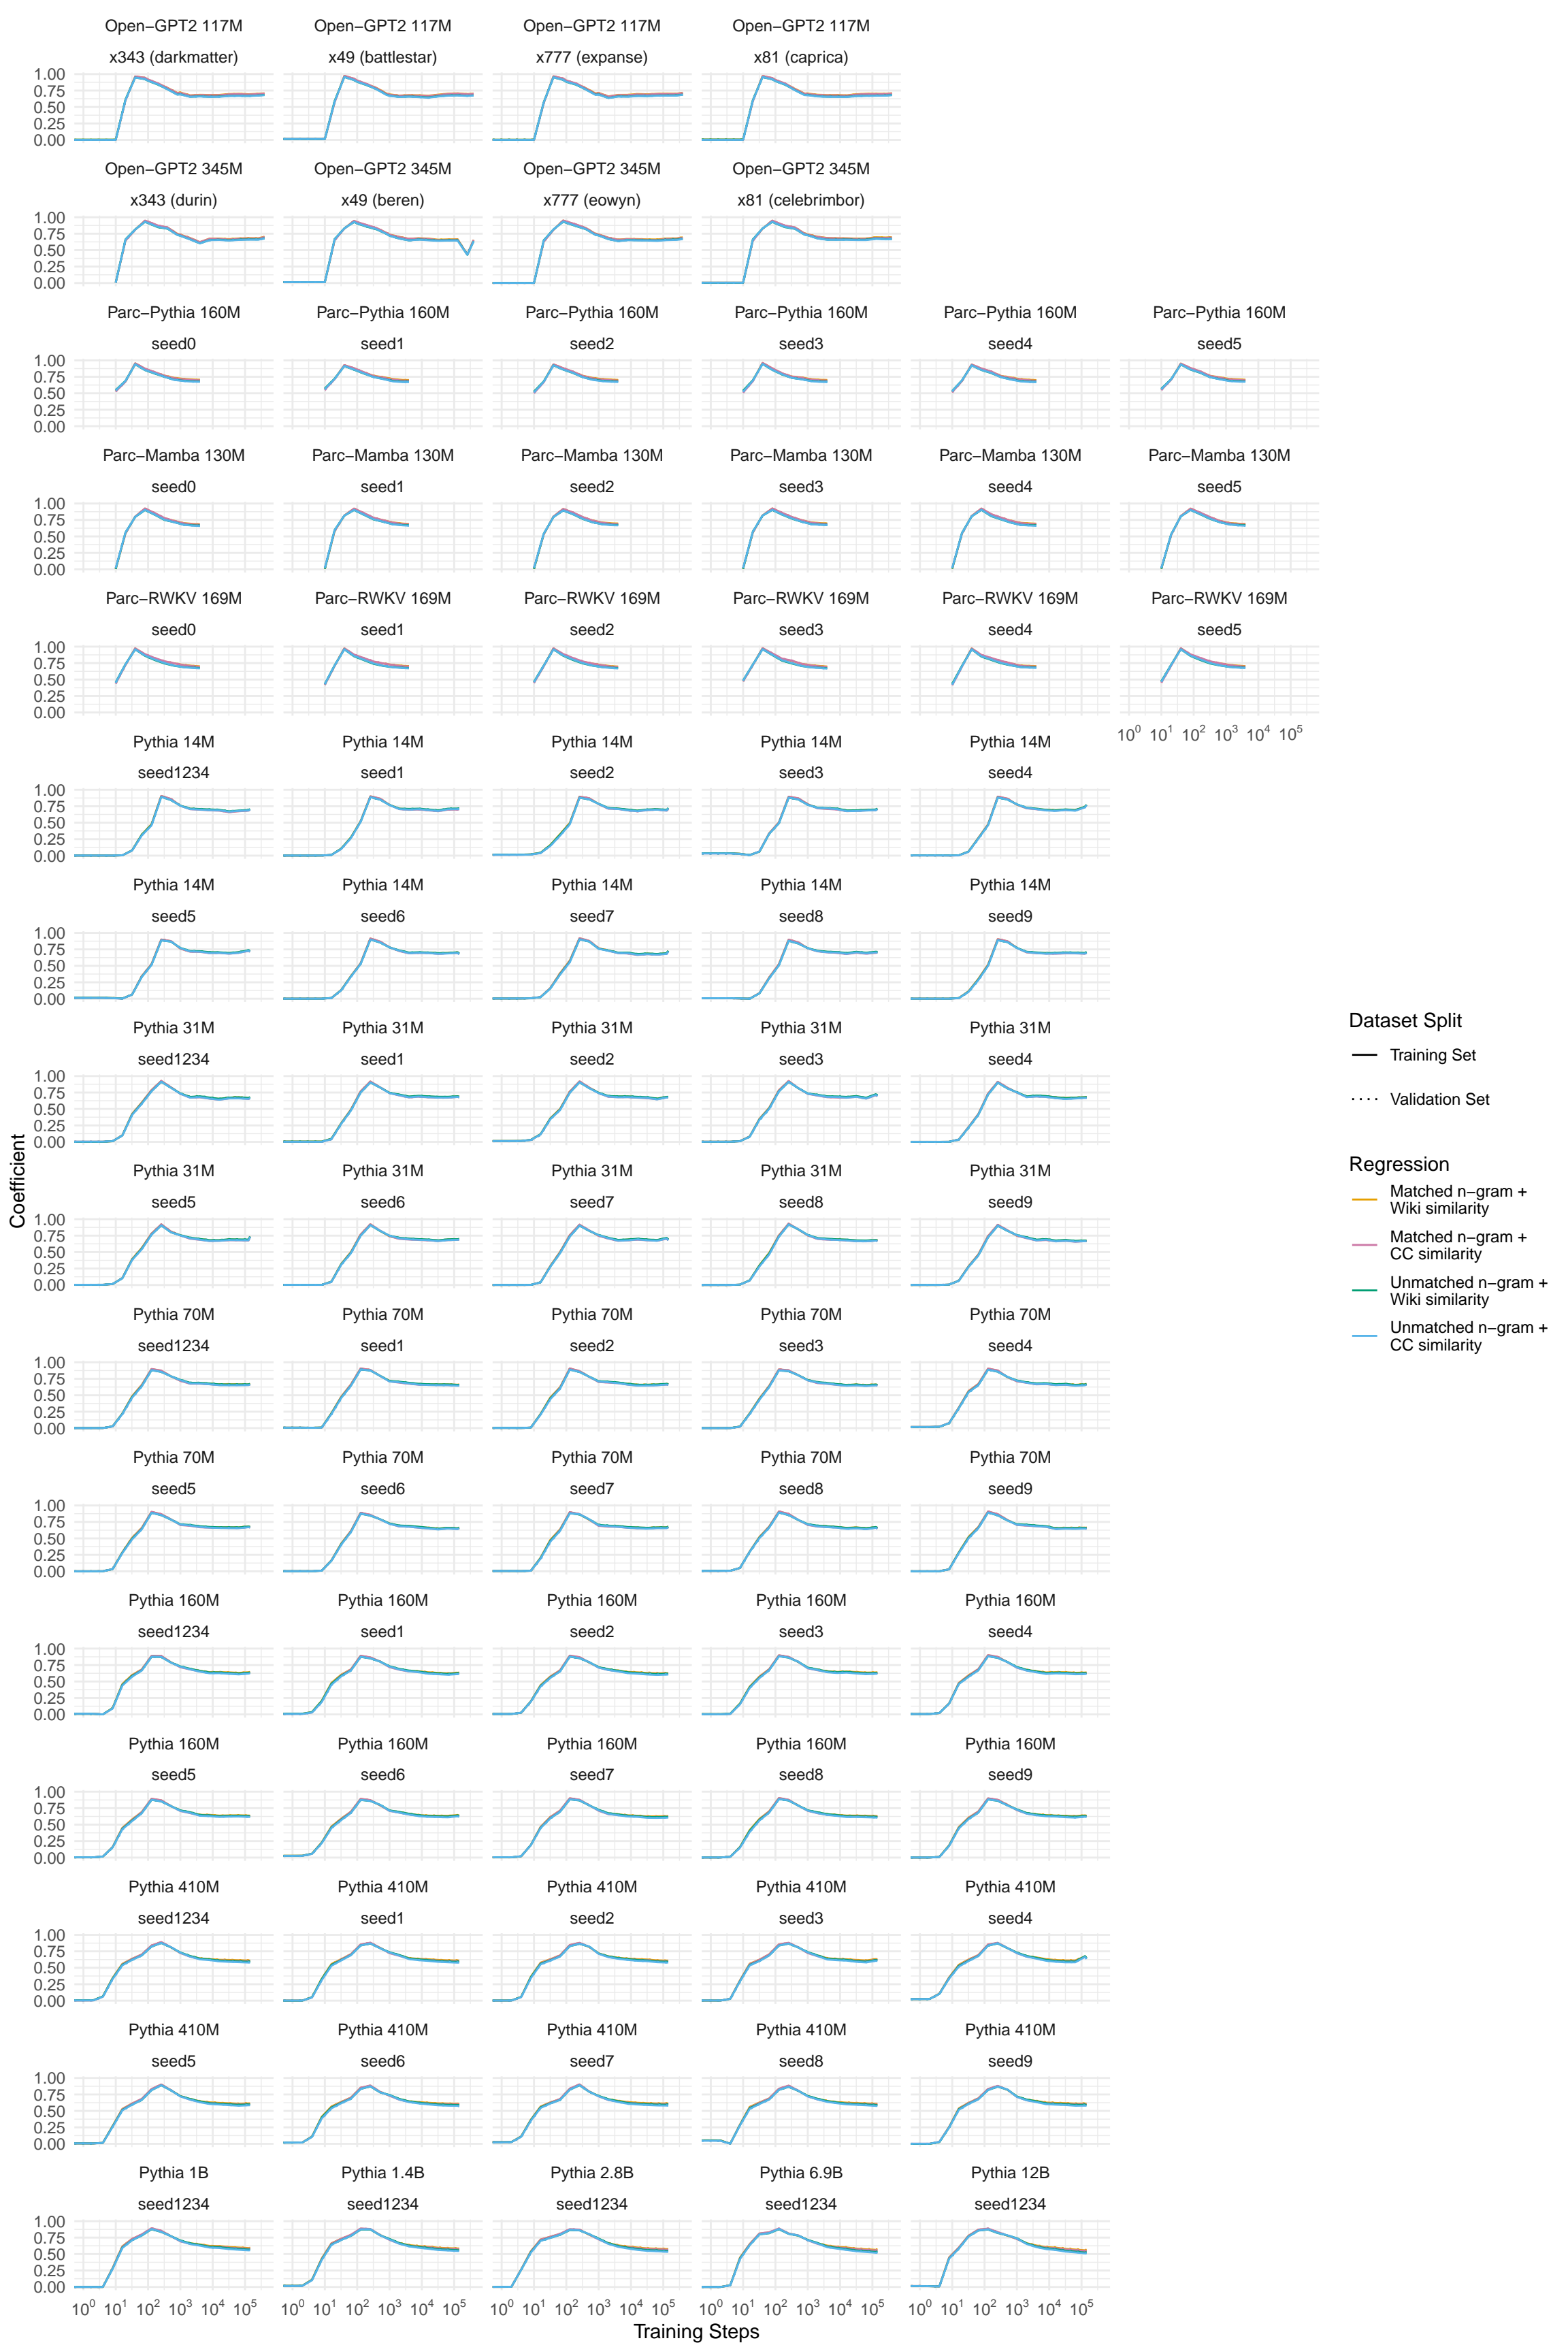

Supplement: supplementary_material [file rsq_seed_ucd.pdf › lm-behavioral-phases/analyses/rsq_seed_ucd.pdf]

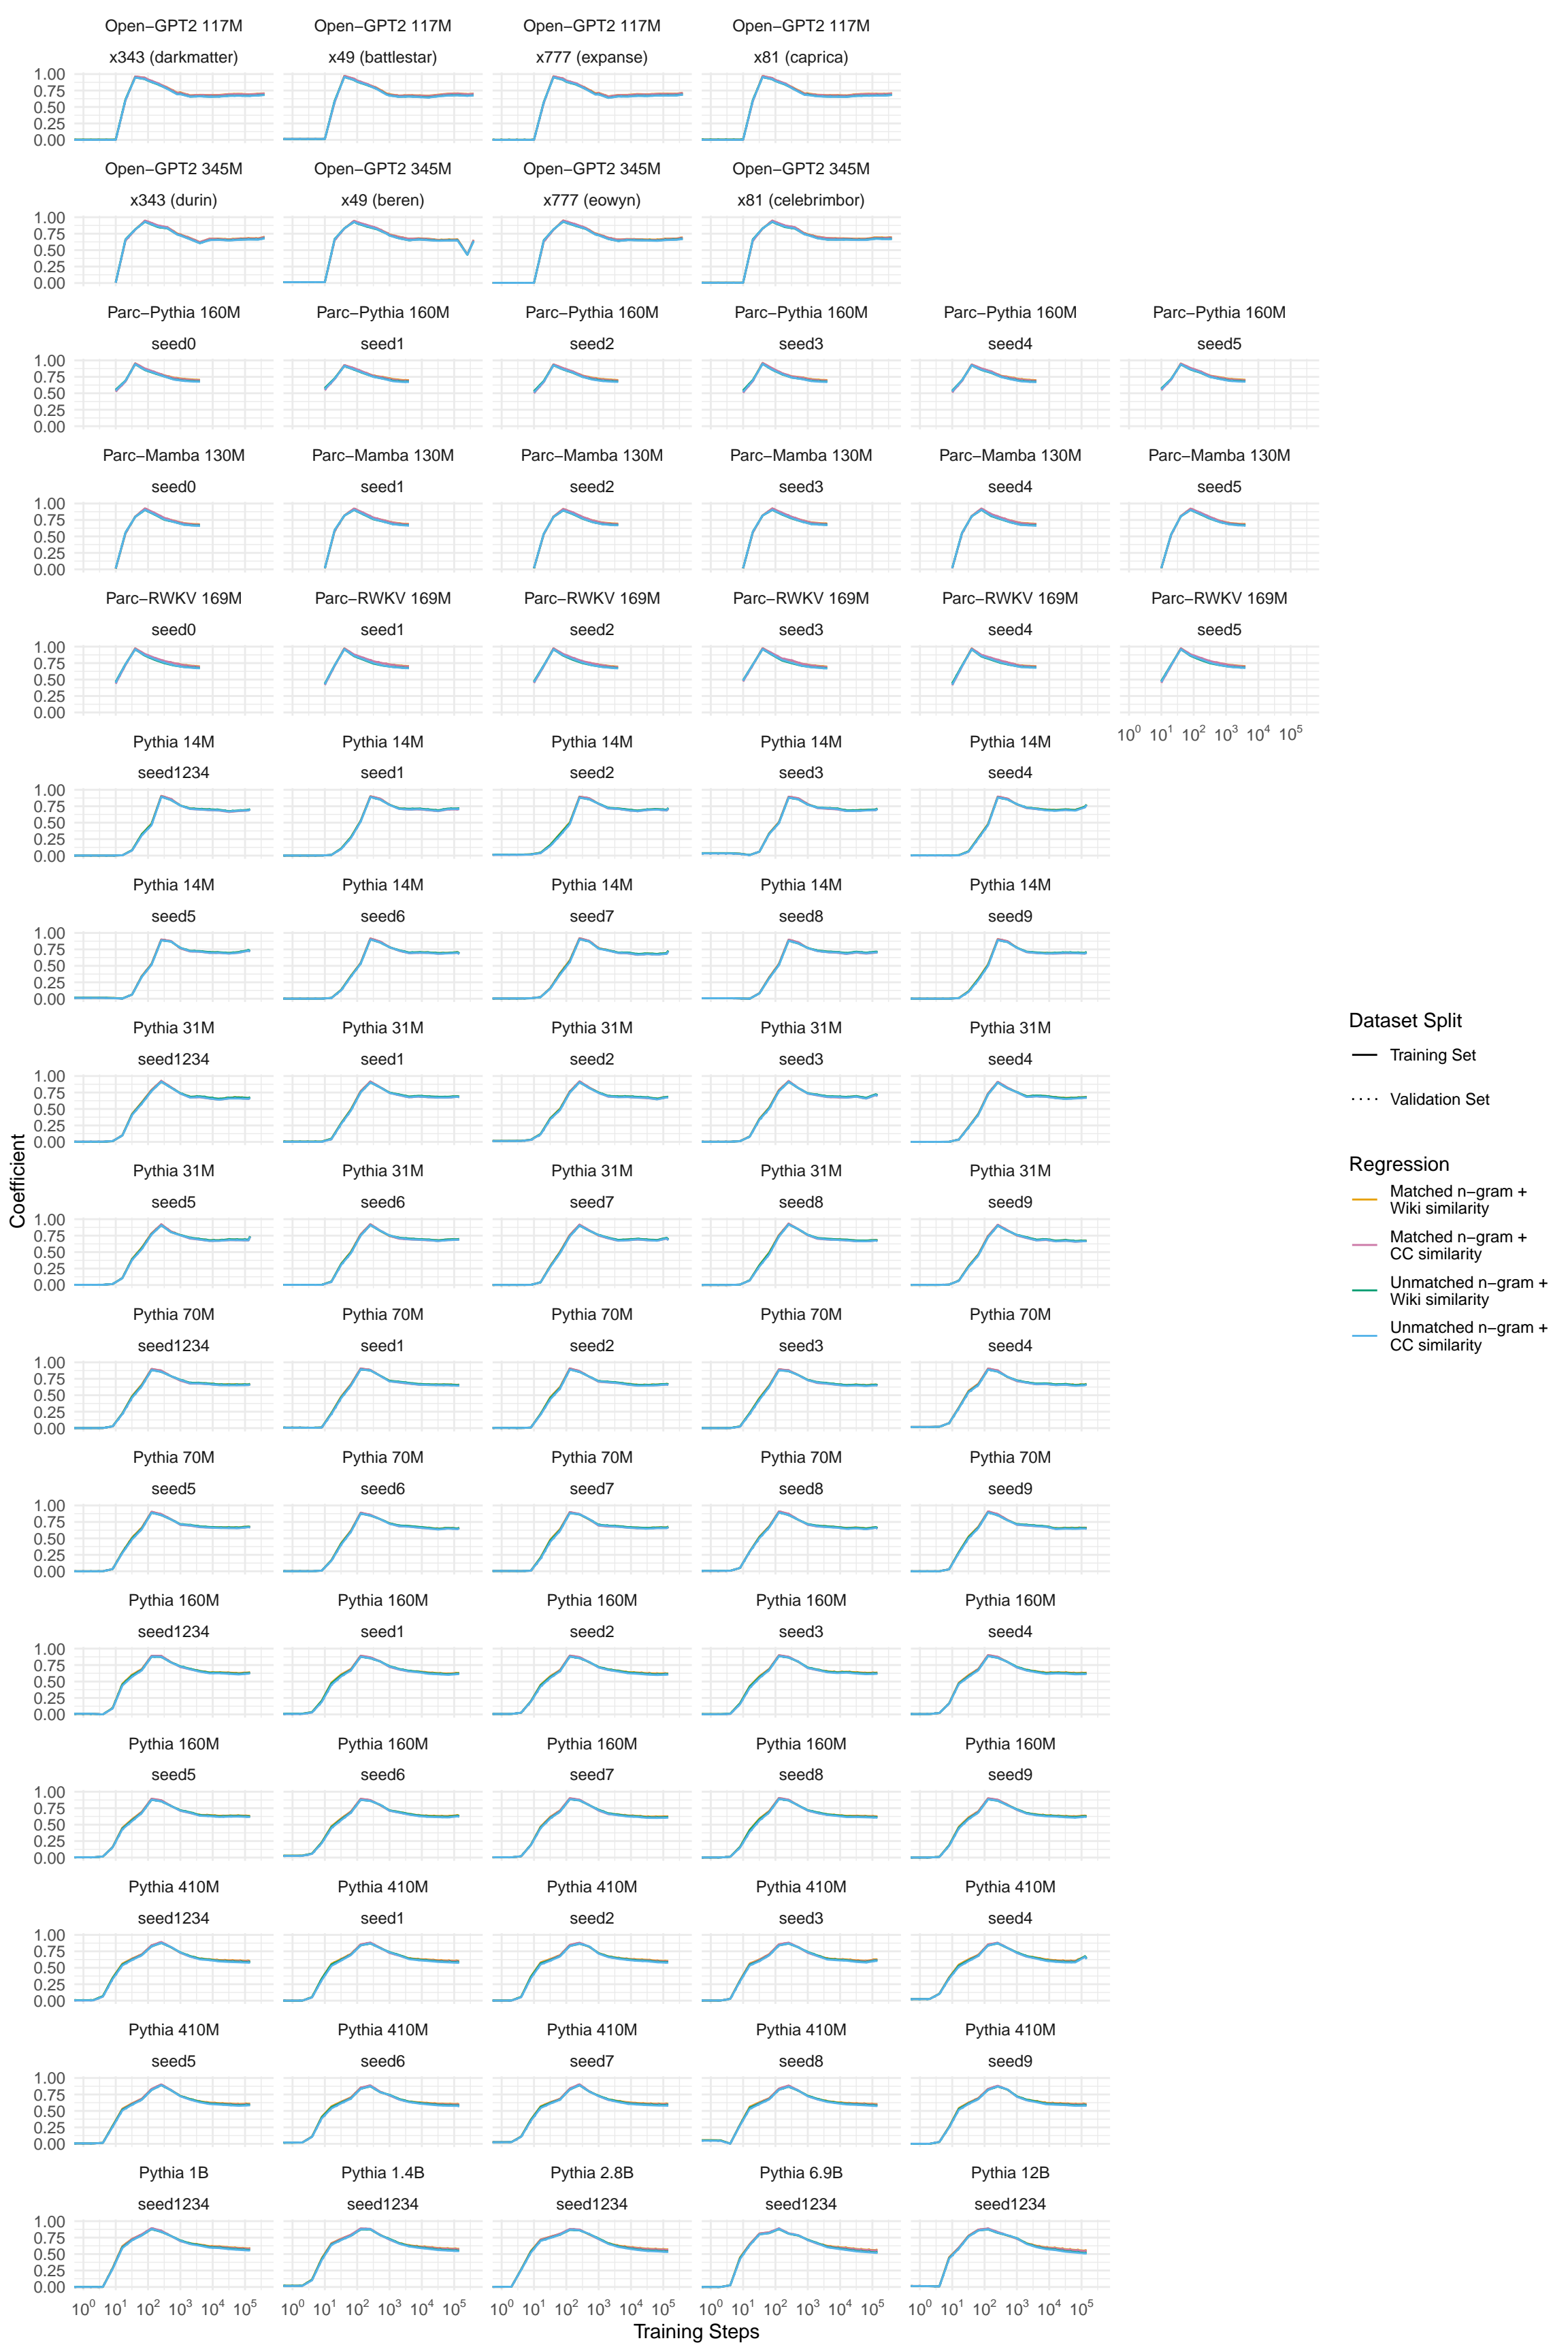

Supplement: supplementary_material [file rsq_seed_wcd.pdf › lm-behavioral-phases/analyses/rsq_seed_wcd.pdf]
